# Supplementary material
Source: MDPI journal article supplement (https://www.mdpi.com/1424-2818/16/3/171)
Supplement: s1 [file s1]

## List S1: List of references of the publications used in the review.

- Adamovicz, L., Allender, M. C., Archer, G., Rzadkowska, M., Boers, K., Phillips, C., Driskell, E., Kinsel, M. J., & Chu, C. (2018). Investigation of multiple mortality events in eastern box turtles (*Terrapene carolina carolina*). PLOS ONE, 13(4), e0195617. <https://doi.org/10.1371/journal.pone.0195617>
- Agarwal, M. (1980). A critical study of the species of *Spinometra* (Trematoda: Plagiorchiidae). Folia Parasitologica, 27, 117–121.
- Aguiar, J., Adriano, E., & Mathews, P. (2017). Morphology and molecular phylogeny of a new *Myxidium* species (Cnidaria: Myxosporea) infecting the farmed turtle *Podocnemis expansa* (Testudines: Podocnemididae) in the Brazilian Amazon. Parasitology International, 66(1), 825–830. <https://doi.org/10.1016/j.parint.2016.09.013>
- Ahne, W. (1993). Viruses of Chelonia. Journal of Veterinary Medicine, Series B, 40(1–10), 35–45. <https://doi.org/10.1111/j.1439-0450.1993.tb00107.x>
- Aisien, M., Olorunsola, D., Ozemoka, H., & Enabulele, E. (2021). A new species of *Cotylaspis* (Aspidogastrea: Cotylaspidinae), parasite of the African mud turtle *Pelusios castaneus* and *Pelusios* sp. (Testudines: Pelomedusidae) from South-Western Nigeria. Biologia, 76(12), 3781–3786. <https://doi.org/10.1007/s11756-021-00883-x>
- Al-Barwari, S., & Saeed, I. (2007). On the helminth fauna of some iraqi reptiles. Türkiye Parazitoloji Dergisi, 31(4), 330–336.
- Al-Daraji, S. (2022). A New Host and a New Locality for *Aspidogaster limacoides* Diesing, 1834 (Trematoda: Aspidogastridae) Infecting the Caspian Freshwater Turtle *Mauremys caspica* (Gmelin, 1774) in Basrah Province, Iraq. Biological and Applied Environmental Research, 6(1), 44–50. <https://doi.org/10.51304/baer.2022.6.1.44>
- Al-Quraishy, S., Abdel-Ghaffar, F., Dkhil, M. A., & Abdel-Gaber, R. (2021). Haemogregarines and Criteria for Identification. Animals, 11(1), 170. <https://doi.org/10.3390/ani11010170>
- Aleksić-Kovačević, S., Özvegy, J., Krstić, N., Rusvai, M., Jakab, C., Stanimirović, Z., & Becskei, Z. (2014). Skin and skeletal system lesions of european pond turtles (*Emys orbicularis*) from natural habitats. Acta Veterinaria Hungarica, 62(2), 180–193. <https://doi.org/10.1556/avet.2013.060>

- Aleksić-Kovačević, S., Vučićević, M., Özvegy, J., Jelisić, S., Djurdjević, B., ProdanovRadulović, J., Došenović, M., & Marinković, D. (2023). Eight-Year Study of *Haemogregarina stepanowi* Infection in Poached European Pond Turtles (*Emys orbicularis*) Held in Belgrade Zoo Quarantine. *Animals*, 13(15), 2429. <https://doi.org/10.3390/ani13152429>
- Alhaboubi, A., Pollard, D., & Holman, P. (2017). Molecular and morphological characterization of a haemogregarine in the alligator snapping turtle, *Macrochelys temminckii* (Testudines: Chelydridae). *Parasitology Research*, 116(1), 207–215. <https://doi.org/10.1007/s00436-016-5280-2>
- Allender, M. C., & Mitchell, M. A. (2013). Hematologic Response to Experimental Infections of Frog Virus 3-Like Virus in Red-Eared Sliders (*Trachemys scripta elegans*). *Journal of Herpetological Medicine and Surgery*, 23(1), 25. <https://doi.org/10.5818/1529-9651-23.1.25>
- Allender, M., Barthel, A., Rayl, J., & Terio, K. (2018). Experimental transmission of frog virus 3–like ranavirus in juvenile chelonians at two temperatures. *Journal of Wildlife Diseases*, 54(4), 716–725. <https://doi.org/10.7589/2017-07-181>
- Alves, P., Vieira, F., Santos, C., Scholz, T., & Luque, J. (2015). A Checklist of the Aspidogastrea (Platyhelminthes: Trematoda) of the World. *Zootaxa*, 3918(3), 339. <https://doi.org/10.11646/zootaxa.3918.3.2>
- Amarga, A., Supsup, C., Tseng, H.-Y., Kwak, M., & Lin, S.-M. (2022). The Asian turtle tick *Amblyomma geoemydae* Cantor, 1847 (Acari: Ixodidae) in the Philippines: First confirmed local host and locality with a complete host index. *Ticks and Tick-borne Diseases*, 13(4), 101958.
- Aplasca, A., Titus, V., Ossiboff, R., Murphy, L., Seimon, T., Ingerman, K., Moser, W., Calle, P., & Sykes, J. (2019). Health assessment of free-ranging chelonians in an urban section of the Bronx river, New York, USA. *Journal of Wildlife Diseases*, 55(2), 352. <https://doi.org/10.7589/2017-12-304>
- Ariel, E., Freeman, A., Elliott, E., Wirth, W., Mashkour, N., & Scott, J. (2017). An unusual mortality event in Johnstone River snapping turtles *Elseya irwini* (Johnstone) in Far North Queensland, Australia. *Australian Veterinary Journal*, 95(10), 355–361. <https://doi.org/10.1111/avj.12627>

- Arizza, V., Sacco, F., Russo, D., Scardino, R., Arculeo, M., Vamberger, M., & Marrone, F. (2016). The good, the bad and the ugly: *Emys trinacris*, *Placobdella costata* and *Haemogregarina stepanowi* in Sicily (Testudines, Annelida and Apicomplexa). *Folia Parasitologica*, 63, 029. <https://doi.org/10.14411/fp.2016.029>
- Austen, J. M., Hall, J., Zahedi, A., Goften, A., & Ryan, U. (2020). Further characterisation of *Haemocystidium* chelodinae-like Haemoproteidae isolated from the Bellinger River snapping turtle (*Myuchelys georgesi*). *Parasitology Research*, 119(2), 601–609. <https://doi.org/10.1007/s00436-019-06547-9>
- Barger, M. A., Thatcher, V. E., & Nickol, B. B. (2004). A New Species of *Neoechinorhynchus* (Acanthocephala: Neoechinorhynchidae) from a Red-Eared Slider (*Trachemys scripta elegans*) in Mexico. *Comparative Parasitology*, 71(1), 1–3. <https://doi.org/10.1654/4099>
- Barton, D., & Fearn, S. (2022). Parasites in feral *Chelodina longicollis* (Shaw, 1794) (Testudines: Pleurodira: Chelidae) in Tasmania. *Australian Journal of Zoology*, 69(3), 92– 101. <https://doi.org/10.1071/ZO21044>
- Bellinati, L., Pesaro, S., Marcer, F., Danesi, P., Natale, A., & Ceglie, L. (2022). Detection of a Novel *Chlamydia* Species in Invasive Turtles. *Animals*, 12(6), 784. <https://doi.org/10.3390/ani12060784>
- Bernardon, F., Valente, A., & Müller, G. (2014). Gastrointestinal helminths of *Trachemys dorbignyi* Duméril & Bibron, 1835 (Testudines, Emydidae) from artificial urban ponds in southern Brazil. *Pan-American Journal of Aquatic Sciences*, 9(1), 54–57.
- Besprozvannykh, V., Atopkin, D., Ermolenko, A., Kharitonova, A., & Khamatova, A. (2015). Life-cycle and genetic characterization of *Astiotrema odhneri* Bhalerao, 1936 sensu Cho & Seo 1977 from the Primorsky Region (Russian Far East). *Parasitology International*, 64(6), 533–539. <https://doi.org/10.1016/j.parint.2015.07.008>
- Bielecki, A., Cichocka, J., Jabłoński, A., Jeleń, I., Ropelewska, E., Biedunkiewicz, A., Terlecki, J., Nowakowski, J., Pakulnicka, J., & Szlachciak, J. (2012). Coexistence of *Placobdella costata* (Fr. Müller, 1846) (Hirudinida: Glossiphoniidae) and mud turtle *Emys orbicularis*. *Biologia*, 67(4), 731–738. <https://doi.org/10.2478/s11756-012-0069-y>
- Bolotov, I., Eliseeva, T., Tsiplenkina, I., Gofarov, M., & Kondakov, A. (2023). Long forgotten record of a freshwater leech on Madagascar indicates a host-associated dispersal event from

continental Africa. Ecologica Montenegrina, 61, 56–67.  
<https://doi.org/10.37828/em.2023.61.7>

Bonacina, E., Oltolina, M., Robbiati, R., Pinzauti, P., & Ebani, V. (2021). Serological Survey on the Occurrence of Anti-*Leptospira* spp. Antibodies in Red-Eared Terrapins (*Trachemys scripta elegans*) Living in a Natural Park of Northern Italy. *Animals*, 11(3), 602.  
<https://doi.org/10.3390/ani11030602>

Bradford, C., Denver, M., & Cranfield, M. (2008). Development of a Polymerase Chain Reaction Test for *Entamoeba invadens*. *Journal of Zoo and Wildlife Medicine*, 39(2), 201–207.  
<https://doi.org/10.1638/2007-0145.1>

Brenes, R., Miller, D., Waltzek, Thomas. B., Wilkes, R., Tucker, J., Chaney, J., Hardman, R., Brand, M., Huether, R., & Gray, M. (2014). Susceptibility of Fish and Turtles to Three Ranaviruses Isolated from Different Ectothermic Vertebrate Classes. *Journal of Aquatic Animal Health*, 26(2), 118–126. <https://doi.org/10.1080/08997659.2014.886637>

Brooks, D. R. (1976). *Neodeuterobaris pritchardae* gen. et sp. n. (Digenea: Microscaphidiidae) in a Sideneck Turtle, *Podocnemis lewyana* Dumeril 1852, from Colombia. *The Journal of Parasitology*, 62(3), 426. <https://doi.org/10.2307/3279152>

Brooks, D., & Mayes, M. (1975). Platyhelminths of Nebraska Turtles with Descriptions of Two New Species of Spirorchiids (Trematoda: Spirorchiidae). *The Journal of Parasitology*, 61(3), 403. <https://doi.org/10.2307/3279311>

Brooks, D., & Sullivan, J. (1981). *Hapalorhynchus rugatus* sp. nov. (Digenea: Spirorchiidae) from a Malaysian freshwater turtle. *Canadian Journal of Zoology*, 59(7), 1335–1338.  
<https://doi.org/10.1139/z81-185>

Bullard, S., Roberts, J., Warren, M., Dutton, H., Whelan, N., Ruiz, C., Platt, T., Tkach, V., Brant, S., & Halanich, K. (2019). Neotropical Turtle Blood Flukes: Two New Genera and Species from the Amazon River Basin with a Key to Genera and Comments on a Marine-Derived Parasite Lineage in South America. *The Journal of Parasitology*, 105(4), 497–523.  
<https://doi.org/10.1645/19-27>

Burridge, M., & Simmons, L. (2003). Exotic ticks introduced into the United States on imported reptiles from 1962 to 2001 and their potential roles in international dissemination of diseases. *Veterinary Parasitology*, 113(3–4), 289–320. [https://doi.org/10.1016/S0304-4017\(03\)00060-8](https://doi.org/10.1016/S0304-4017(03)00060-8)

- Burse, C., & Freeman, J. (2005). New Species of *Falcaustra* (Nematoda:Kathlaniidae) from *Heosemys grandis* (Testudines: Emydidae). The Journal of Parasitology, 91(5), 1150–1152. <https://doi.org/10.1645/GE-3481.1>
- Burse, C., & Platt, S. (2018). New Species of *Falcaustra* (Nematoda: Kathlaniidae) in *Batagur trivittata* (Testudines: Geoemydidae) from Myanmar. Acta Parasitologica, 63(4), 669–677.
- Busse, H.-J., Kämpfer, P., Szostak, M., & Spargser, J. (2022). *Ottowia testudinis* sp. Nov., isolated from the cloaca of a giant Asian pond turtle (*Heosemys grandis*). International Journal of Systematic and Evolutionary Microbiology, 72(5), 1466–5034.
- Byers, J., Altman, I., Grosse, A., Huspeni, T., & Maerz, J. (2011). Using Parasitic Trematode Larvae to Quantify an Elusive Vertebrate Host: Trematode and Host Abundance. Conservation Biology, 25(1), 85–93. <https://doi.org/10.1111/j.1523-1739.2010.01583.x>
- Cardells, J., Garijo, M., Marín, C., & Vega, S. (2014). Helminths from the red-eared slider *Trachemys scripta elegans* (Chelonia: Emydidae) in marshes from the eastern Iberian Peninsula: First report of *Telorchis attenuata* (Digenea: Telorchidae). Basic and Applied Herpetology, 28, 153–159.
- Carranco, A., Gillingham, M., Wilhelm, K., Torres, M., Sommer, S., & Romo, D. (2022). Transcending sea turtles: First report of hatching failure in eggs of an Amazonian freshwater turtle with symptoms of the fungal emerging disease fusariosis. Transboundary and Emerging Diseases, 69(5). <https://doi.org/10.1111/tbed.14596>
- Carstairs, S. (2019). Evidence for low prevalence of ranaviruses in Ontario, Canada's freshwater turtle population. PeerJ, 7, e6987. <https://doi.org/10.7717/peerj.6987>
- Carstairs, S., Kyle, C., & Vilaça, S. (2020). High prevalence of subclinical frog virus 3 infection in freshwater turtles of Ontario, Canada. Virology, 543, 76–83. <https://doi.org/10.1016/j.virol.2020.01.016>
- Cerreta, A., Reinhart, J., Forsythe, L., O'Connor, M., Tang, K., Cox, S., & Keller, K. (2022). Bioencapsulation is a feasible method of terbinafine administration in *Emydomyces testavorans*-infected western pond turtles (*Actinemys marmorata*). American Journal of Veterinary Research, 1–8. <https://doi.org/10.2460/ajvr.22.08.0138>
- Ceylan, M., & Çetinkaya, O. (2023). First report of leech parasitism in freshwater turtles for Turkish wetlands. Journal of Limnology and Freshwater Fisheries Research, 9(2), 108–114. <https://doi.org/10.17216/limnofish.1270081>

- Ceylan, O., Gül, Ç., Çördük, N., Hacıoğlu Doğru, N., & Tosunoğlu, M. (2023). Prevalence of *Haemogregarina stepanowi* and Assessment of Some Risk Factors in *Mauremys rivulata* (Valenciennes, 1833) Freshwater Turtles (Testudines: Geoemydidae). Turkish Journal of Parasitology, 47(1), 22–27. <https://doi.org/10.4274/tpd.galenos.2022.38257>
- Chaabane, A., Du Preez, L., Johnston, G., & Verneau, O. (2022). Revision of the systematics of the Polystomoidinae (Platyhelminthes, Monogenea, Polystomatidae) with redefinition of *Polystomoides* Ward, 1917 and *Uteropolystomoides* Tinsley, 2017. Parasite, 29, 56. <https://doi.org/10.1051/parasite/2022056>
- Chaffin, K., Norton, T., Gilardi, K., Poppenga, R., Jensen, J., Moler, P., Cray, C., Dierenfeld, E., Chen, T., Oliva, M., Origi, F., Gibbs, S., Mazzaro, L., & Mazet, J. (2008). HEALTH ASSESSMENT OF FREE-RANGING ALLIGATOR SNAPPING TURTLES (*Macrochelys temminckii*) IN GEORGIA AND FLORIDA. Journal of Wildlife Diseases, 44(3), 670–686. <https://doi.org/10.7589/0090-3558-44.3.670>
- Chaviel, B., Mascarenhas, C., Bernardon, F., Coimbra, M., & Müller, G. (2020). New records of helminths in Chelidae freshwater turtles (Testudines) in South America. Revista Brasileira de Zoociências, 21(1), 1–11. <https://doi.org/10.34019/2596-3325.2020.v21.28232>
- Chen, M., Li, D., Fang, J., Zhang, L., Gu, Y., Liu, L., & Zhang, G. (2017). Apolipoprotein mediates soft-shelled turtle systemic septicemia spherical virus (STSSSV) infection. Aquaculture, 473, 501–507. <https://doi.org/10.1016/j.aquaculture.2017.03.022>
- Chen, P.-N., Sidique, S., Ali, M., Aziz, N., & Wahid, M. (2022). Microbiota occurrence during COVID-19 at the Southern River Terrapin (*Batagur affinis*) hatchery in Terengganu, Malaysia. Malayan Nature Journal, 74(3), 381–384.
- Chiangkul, K., Trivalairat, P., Kunya, K., & Purivirojkul, W. (2021). *Placobdelloides tridens* sp. n., a new species of glossiphoniid leech (Hirudinea: Rhynchobdellida) found feeding on captive *Orlitia borneensis* in Thailand, and an update to the host distribution of *P. siamensis*. Systematic Parasitology, 98(2), 141–154. <https://doi.org/10.1007/s11230-021-09967-3>
- Chodkowski, N., Williams, J., & Burke, R. (2016). Field Surveys and Experimental Transmission of *Pleurogonius malaclemys* (Digenea: Pronocephalidae), an Intestinal Parasite of the Diamondback Terrapin *Malaclemys terrapin*. Journal of Parasitology, 102(4), 410–418. <https://doi.org/10.1645/14-624>

- Christoffersen, M., & Assis, J. (2013). A systematic monograph of the Recent Pentastomida, with a compilation of their hosts. Zoologische Mededelingen, Leiden, 87.
- Chung, T., Yi, S., Kim, B., Kim, W., & Shin, G. (2017). Identification and antibiotic resistance profiling of bacterial isolates from septicemic soft-shelled turtles (*Pelodiscus sinensis*). Veterinární Medicína, 62(3), 169–177. <https://doi.org/10.17221/65/2016-VETMED>
- Colon, V., Lugsomya, K., Lam, H., Wahl, L., Parkes, R., Cormack, C., Horlbog, J., Stevens, M., Stephan, R., & Magouras, I. (2022). Serotype Diversity and Antimicrobial Resistance Profile of *Salmonella enterica* Isolates From Freshwater Turtles Sold for Human Consumption in Wet Markets in Hong Kong. Frontiers in Veterinary Science, 9, 912693. <https://doi.org/10.3389/fvets.2022.912693>
- Cook, C., Netherlands, E., & Smit, N. (2015). First *Hemolivia* from southern Africa: Reassigning chelonian *Haemogregarina parvula* Dias, 1953 (Adeleorina: Haemogregarinidae) to *Hemolivia* (Adeleorina: Karyolysidae). African Zoology, 50(2), 165–173. <https://doi.org/10.1080/15627020.2015.1044467>
- Correa, J., Hernández-Ruz, E., De Santana Miglionico, M., & Viana, L. (2018). A new species of *Isospora* Schneider, 1881 (Apicomplexa: Eimeriidae) from the twist-necked turtle *Platemys platycephala* (Schneider) (Testudines: Chelidae) in Brazil. Systematic Parasitology, 95(2–3), 319–324. <https://doi.org/10.1007/s11230-018-9777-1>
- Correa, J., Picelli, A., Silva, M., Valadão, R., Hernández-Ruz, E., & Viana, L. (2022). Phylogenetic analysis of chelonian hemogregarines reveals shared species among the Amazonian freshwater turtle *Podocnemis* spp. And provides a description of two new species of *Haemogregarina*. Parasitology Research, 121(2), 691–701. <https://doi.org/10.1007/s00436-021-07405-3>
- Cribb, T., & Pichelin, S. (1997). *Notopronocephalus peekayi* gen. Et sp. N. (Digenea: Pronocephalidae) from Australian freshwater turtles. Folia Parasitologica, 44, 279–282.
- Curran, S., Overstreet, R., Collins, D., & Benz, G. (2014). *Levisunguis subaequalis* n. g., n. sp., a tongue worm (Pentastomida: Porocephalida: Sebekidae) infecting softshell turtles, *Apalone* spp. (Testudines: Trionychidae) in the southeastern United States. Systematic Parasitology, 87(1), 33–45. <https://doi.org/10.1007/s11230-013-9459-y>

- Dang, W., Lu, H., Gao, Y., Xu, N., Qu, T., & Liu, Y. (2015). Molecular analysis of inducible Heat shock protein 70 of *Pelodiscus sinensis* and its effects during pathogen (*Aeromonas hydrophila*) infection. *Aquaculture*, 442, 93–99. <https://doi.org/10.1016/j.aquaculture.2015.02.030>
- Davis, A., & Sterrett, S. (2011). Prevalence of *Haemogregarine* parasites in three freshwater turtle species in a population in Northeast Georgia, USA. *International Journal of Zoological Research*, 7(2), 156–163.
- Davy, C. M., Shim, K. C., & Coombes, S. M. (2009). Leech (Annelida: Hirudinea) Infestations on Canadian Turtles, Including the First Canadian Record of *Helobdella modesta* from Freshwater Turtles. *The Canadian Field-Naturalist*, 123(1), 44. <https://doi.org/10.22621/cfn.v123i1.673>
- Deeds, O., & Jahn, T. (1939). Coccidian Infections of Western Painted Turtles of the Okoboji Region. *Transactions of the American Microscopical Society*, 58(3), 249. <https://doi.org/10.2307/3222875>
- Dégi, J., Herman, V., Radulov, I., Morariu, F., Florea, T., & Imre, K. (2023). Surveys on Pet- Reptile-Associated Multi-Drug-Resistant *Salmonella* spp. In the Timișoara Metropolitan Region—Western Romania. *Antibiotics*, 12(7), 1203. <https://doi.org/10.3390/antibiotics12071203>
- Demkowska-Kutrzepa, M., Studzińska, M., Roczeń-Karczmarsz, M., Tomczuk, K., Abbas, Z., & Róžański, P. (2018). A review of the helminths co-introduced with *Trachemys scripta* elegans – a threat to European native turtle health. *Amphibia-Reptilia*, 39(2), 177–189. <https://doi.org/10.1163/15685381-17000159>
- Demkowska-Kutrzepa, M., Szczepaniak, K., Roczeń-Karczmarsz, M., Palumbo, E. O., Studzińska, M., Róžański, P., & Tomczuk, K. (2021). The first case of *Spiroxys contortus* in European pond turtle (*Emys orbicularis*) in the wild in Poland. *International Journal for Parasitology: Parasites and Wildlife*, 16, 26–29. <https://doi.org/10.1016/j.ijppaw.2021.07.004>
- Desser, S., & Yekutieli, D. (1986). Blood parasites of amphibians and Reptiles in Israel. *Israel Journal of Ecology and Evolution*, 34(1–2), 77–90.
- Dezfuli, B., & Tinti, F. (1998). Species Recognition of Congeneric Acanthocephalans in Slider Turtles by Random-Amplified Polymorphic DNA (RAPD) Markers. *The Journal of Parasitology*, 84(4), 860. <https://doi.org/10.2307/3284605>
- Dezzutto, D., Barbero, R., Canale, G., Acutis, P., Biolatti, C., Dogliero, A., Mitzy, M., Francione, P., Colzani, A., Bergagna, S., & Gennero, M. (2017). Detection of *Leptospira* spp. In Water Turtle



- (*Trachemys scripta*) Living in Ponds of Urban Parks. *Veterinary Sciences*, 4(4), 51.  
<https://doi.org/10.3390/vetsci4040051>
- DiGeronimo, P. M., Hansen, C., Latney, L. T., Adamovicz, L., & Allender, M. (2019). DETECTION OF MYCOPLASMA SP. IN INDOCHINESE BOX TURTLES (*Cuora bourreti*). *Journal of Zoo and Wildlife Medicine*, 50(1), 254–257.
- Ding, L., Li, W., Liang, L., Huang, Z., Li, N., Zhang, J., Shi, H., Storey, K., & Hong, M. (2021). Modulation of the intestinal barrier adaptive functions in red-eared slider (*Trachemys scripta elegans*) invading brackish waters. *Science of The Total Environment*, 751, 141744.
- Domènech, F., Marquina, R., Soler, L., Valls, L., Aznar, F. J., Fernández, M., Navarro, P., & Lluch, J. (2016). Helminth fauna of the invasive American red-eared slider *Trachemys scripta* in eastern Spain: Potential implications for the conservation of native terrapins. *Journal of Natural History*, 50(7–8), 467–481. <https://doi.org/10.1080/00222933.2015.1062931>
- Doszpoly, A., Wellehan, J., Childress, A., Tarján, Z., Kovács, E., Harrach, B., & Benkő, M. (2013). Partial characterization of a new adenovirus lineage discovered in testudinoid turtles. *Infection, Genetics and Evolution*, 17, 106–112.  
<https://doi.org/10.1016/j.meegid.2013.03.049>
- Drózdź, M., Małaszczuk, M., Paluch, E., & Pawlak, A. (2021). Zoonotic potential and prevalence of *Salmonella* serovars isolated from pets. *Infection Ecology & Epidemiology*, 11(1), 1975530. <https://doi.org/10.1080/20008686.2021.1975530>
- Drzewiecka, D. (2016). Significance and Roles of *Proteus* spp. Bacteria in Natural Environments. *Microbial Ecology*, 72(4), 741–758. <https://doi.org/10.1007/s00248-015-0720-6>
- Du Preez, L., & Lim, L. (2000). *Neopolystoma liewi* sp. n. (Monogenea: Polystomatidae) from the eye of the Malayan box turtle (*Cuora amboinensis*). *Folia Parasitologica*, 47(1), 11– 16.  
<https://doi.org/10.14411/fp.2000.003>
- Du Preez, L., & Morrison, C. (2012). Two new polystomes (Monogenea: Polystomatidae) from the eyes of North American freshwater turtles. *Zootaxa*, 3392(1), 47.  
<https://doi.org/10.11646/zootaxa.3392.1.3>
- Du Preez, L., & Van Rooyen, M. (2015). A new polystomatid (Monogenea, Polystomatidae) from the mouth of the North American freshwater turtle *Pseudemys nelsoni*. *ZooKeys*, 539, 1–9.  
<https://doi.org/10.3897/zookeys.539.6108>

- Du Preez, L., & Verneau, O. (2020). Eye to eye: Classification of conjunctival sac polystomes (Monogenea: Polystomatidae) revisited with the description of three new genera *Apaloneotrema* n. g., *Aussietrema* n. g. and *Fornixtrema* n. g. *Parasitology Research*, 119(12), 4017–4031. <https://doi.org/10.1007/s00436-020-06888-w>
- Du Preez, L., Badets, M., Héritier, L., & Verneau, O. (2017). Tracking platyhelminth parasite diversity from freshwater turtles in French Guiana: First report of *Neopolystoma* Price, 1939 (Monogenea: Polystomatidae) with the description of three new species. *Parasites & Vectors*, 10(1), 53. <https://doi.org/10.1186/s13071-017-1986-y>
- Dutton, H., & Bullard, S. (2020). A new species and emendation of the seldom reported *Enterohaematotrema* Mehra, 1940 (Digenea: Schistosomatoidea), including a revised phylogenetic hypothesis for turtle blood flukes. *Systematic Parasitology*, 97(4), 335–345. <https://doi.org/10.1007/s11230-020-09920-w>
- Dutton, H., Du Preez, L., Verneau, O., Whelan, N., & Bullard, S. (2021). First Record of a Polystome from Alligator Snapping Turtle, *Macrochelys temminckii* (Cryptodira: Chelydridae) or Mississippi; with Comments on “*Neopolystoma orbiculare* (Stunkard, 1916)” and Its Junior Subjective Synonyms. *The Journal of Parasitology*, 107(1), 74–88. <https://doi.org/10.1645/20-96>
- Dutton, H., DuPreez, L., Urabe, M., & Bullard, S. (2022). *Paraharmotrema karinganiense* n. Gen., n. Sp. (Digenea: Liolopidae) infecting the intestine of serrated hinged terrapin (*Pelusios sinuatus*), east African black mud turtle (*Pelusios subniger*), and South African helmeted turtle (*Pelomedusa galeata*) and a phylogenetic hypothesis for liolopid genera. *International Journal for Parasitology: Parasites and Wildlife*, 17, 43–52. <https://doi.org/10.1016/j.ijppaw.2021.09.006>
- Dutton, H., Warren, M., & Bullard, S. (2019). New Genus and Species of Turtle Blood Fluke (Platyhelminthes: Digenea: Schistosomatoidea) Infecting Six-Tubercled Amazon River Turtles, *Podocnemis sextuberculata* (Pleurodira: Podocnemididae) from the Amazon River Basin (Peru). *The Journal of Parasitology*, 105(5), 671–685. <https://doi.org/10.1645/19-68>
- Dvořáková, N., Čepička, I., Qablan, M., Gibson, W., Blažek, R., & Šíroký, P. (2015a). Phylogeny and Morphological Variability of Trypanosomes from African Pelomedusid Turtles with Redescription of *Trypanosoma mocambicum* Pienaar, 1962. *Protist*, 166(6), 599–608. <https://doi.org/10.1016/j.protis.2015.10.002>

- Dvořáková, N., Kvičerová, J., Hostovský, M., & Šíroký, P. (2015b). Haemogregarines of freshwater turtles from Southeast Asia with a description of *Haemogregarina sacaliae* sp. n. And a redescription of *Haemogregarina pellegrini* Laveran and Pettit, 1910. *Parasitology*, 142(6), 816–826. <https://doi.org/10.1017/S0031182014001930>
- Dvořáková, N., Kvičerová, J., Papoušek, I., Javanbakht, H., Tiar, G., Kami, H., & Šíroký, P. (2014). Haemogregarines from western Palaearctic freshwater turtles (genera *Emys*, *Mauremys*) are conspecific with *Haemogregarina stepanowi* Danilewsky, 1885. *Parasitology*, 141(4), 522–530. <https://doi.org/10.1017/S0031182013001820>
- Dyer, W., & Carr, J. (1990). Some Digenas of the Neotropical Turtle Genus *Rhinoclemys* in Mexico and South America. *Journal of Helminthological Society of Washington*, 57(1), 12–14.
- Eichner, M., & Garcia, K. (2019). Increase in morbidity and mortality in a shipment of red-eared slider turtles (*Trachemys scripta elegans*). *Laboratory Animals*, 53(6), 634–640. <https://doi.org/10.1177/0023677219858166>
- El Hili, R., Achouri, M., & Verneau, O. (2020). The genetic diversity of blood parasites within the freshwater turtles *Mauremys leprosa* and *Emys orbicularis* in Tunisia reveals coinfection with *Haemogregarina* spp. *Parasitology Research*, 119(10), 3315–3326. <https://doi.org/10.1007/s00436-020-06821-1>
- El Hili, R., Achouri, M., & Verneau, O. (2021). Cytochrome c oxidase I phylogenetic analysis of *Haemogregarina* parasites (Apicomplexa, Coccidia, Eucoccidiorida, Haemogregarinidae) confirms the presence of three distinct species within the freshwater turtles of Tunisia. *Parasitology International*, 82, 102306. <https://doi.org/10.1016/j.parint.2021.102306>
- Enabulele, E. E., Aisien, M. S. O., & Preez, L. H. D. (2012). *Polystomoides bourgati* (Monogenea: Polystomatidae) Infecting *Pelusios castaneus* in Southern Nigeria. *African Zoology*, 47(1), 42–47. <https://doi.org/10.3377/004.047.0108>
- Essbauer, S., & Ahne, W. (2001). Viruses of Lower Vertebrates. *Journal of Veterinary Medicine Series B*, 48(6), 403–475. <https://doi.org/10.1046/j.1439-0450.2001.00473.x>
- Fediras, S., Rouag, R., Ziane, N., Olivier, A., Béchet, A., & Benyacoub, S. (2017). Prevalence of *Placobdella costata* (Fr. Müller, 1846) (Hirudinida: Glossiphoniidae) on the European pond turtle (*Emys orbicularis*) in northeast Algeria. *Herpetology Notes*, 10, 3–8.
- Ferguson, M., Cribb, T., & Smales, L. (1999). Life-cycle and biology of *Sychnocotyle kholo* n. g., n. sp. (Trematoda: Aspidogastrea) in *Emydura macquarii* (Pleurodira: Chelidae) from southern

Queensland, Australia. Systematic Parasitology, 43(1), 41–48.  
<https://doi.org/10.1023/A:1006179916764>

Ferronato, B., Marques, T., Souza, F., Verdade, L., & Matushima, E. (2009). Oral bacterial microbiota and traumatic injuries of free-ranging *Phrynops geoffroanus* (Testudines, Chelidae) in southeastern Brazil.

Fischthal, J., & Kuntz, R. (1981). Additional Records of Trematodes of Amphibians and Reptiles from Taiwan. Zoologica Scripta, 10(3), 161–166. <https://doi.org/10.1111/j.1463-6409.1981.tb00493.x>

Flaminio, K., Cox, S., Haman, K., Allender, M., Grovers, B., & Court, M. (2022). Pharmacokinetics of Nebulized Terbinafine in Plasma and Keratin of Northwestern Pond Turtles (*Actinemys marmorata*) Associated with Emydomycosis. Journal of Herpetological Medicine and Surgery, 32(1), 48–55. <https://doi.org/10.5818/JHMS-D-20-00022>

Flint, M., Limpus, D., Limpus, C., Patterson-Kane, J., Eales, J., & Mills, P. (2011). Biochemical and hematological reference intervals for Krefft's turtles *Emydura macquarii krefftii* from the Burnett River Catchment, Australia. Diseases of Aquatic Organisms, 95(1), 43–48. <https://doi.org/10.3354/dao02352>

Flores-Peredo, R., Berman-Salas, A., Romero-Salas, D., & Mella-Méndez, I. (2021). New Record of Endoparasites Nematodes (Nematoda: Ascarididae, Ancylostomatidae, Physalopteridae, Trichuridae) For Turtles *Trachemys venusta venusta* (Testudines: Emydidae). EAS Journal of Parasitology and Infectious Diseases, 3.

Fonseca, C., Rojas, N., Vieira, F., Ferreira, A., Rodrigues, M., Barros, M., Júnior, V., Moura, G., & Oliveira, J. (2021). Helminth fauna and histopathology associated with parasitic infections in *Phrynops geoffroanus* (Schweigger, 1812) (Testudines, Chelidae) in a Brazilian river subjected to anthropogenic activities. Veterinary Parasitology: Regional Studies and Reports, 26, 100639. <https://doi.org/10.1016/j.vprsr.2021.100639>

Frazier, J., & Keirans, J. (1990). Ticks (Acari: Ixodidae) collected on chelonians (Reptilia) from India and Burma. Journal of the Bombay Natural History Society, 87(2), 247–249.

Gambino, D., Vicari, D., Vitale, M., Schirò, G., Mira, F., Giglia, M., Riccardi, A., Gentile, A., Giardina, S., Carrozzo, A., Cumbo, V., Lastra, A., & Gargano, V. (2021). Study on Bacteria Isolates and Antimicrobial Resistance in Wildlife in Sicily, Southern Italy. Microorganisms, 9(1), 203. <https://doi.org/10.3390/microorganisms9010203>

- García-Martín, J., Sarmiento-Ramírez, J., & Diéguez-Uribeondo, J. (2021). Beyond Sea Turtles: *Fusarium keratoplasticum* in Eggshells of *Podocnemis unifilis*, a Threatened Amazonian Freshwater Turtle. *Journal of Fungi*, 7(9), 742. <https://doi.org/10.3390/jof7090742>
- García, G., Ramos, F., Pérez, R., Yañez, J., Estrada, M., Mendoza, L., Martinez-Hernandez, F., & Gaytán, P. (2014). Molecular epidemiology and genetic diversity of *Entamoeba* species in a chelonian collection. *Journal of Medical Microbiology*, 63(2), 271–283. <https://doi.org/10.1099/jmm.0.061820-0>
- Goes, V., Brito, E., Valadao, R., Gutierrez, C., Picelli, A., & Viana, L. (2018). *Haemogregarine* (Apicomplexa: Adeleorina) infection in Vanderhaege's toad-headed turtle, *Mesoclemmys vanderhaegei* (Chelidae), from a Brazilian Neotropical savanna region. *Folia Parasitologica*, 65, 012. <https://doi.org/10.14411/fp.2018.012>
- González, L., Pacheco, M., Escalante, A., Jiménez Maldonado, A., Cepeda, A., Rodríguez-Fandiño, O., Vargas-Ramírez, M., & Matta, N. (2019). *Haemocystidium* spp., a species complex infecting ancient aquatic turtles of the family Podocnemididae: First report of these parasites in *Podocnemis vogli* from the Orinoquia. *International Journal for Parasitology: Parasites and Wildlife*, 10, 299–309. <https://doi.org/10.1016/j.ijppaw.2019.10.003>
- Goodman, R., Carter, E., & Miller, D. (2021). Influence of Herbicide Exposure and Ranavirus Infection on Growth and Survival of Juvenile Red-Eared Slider Turtles (*Trachemys scripta elegans*). *Viruses*, 13(8), 1440. <https://doi.org/10.3390/v13081440>
- Goodman, R., Miller, D., & Ararso, Y. (2013). Prevalence of Ranavirus in Virginia Turtles as Detected by Tail-Clip Sampling Versus Oral-Cloacal Swabbing. *Northeastern Naturalist*, 20(2), 325–332. <https://doi.org/10.1656/045.020.0208>
- Goodwin, A., & Merry, G. (2011). Replication and persistence of VHSV IVb in freshwater turtles. *Diseases of Aquatic Organisms*, 94(3), 173–177. <https://doi.org/10.3354/dao02328>
- Gu, S., Liu, J., Xiong, L., Dong, J., Sun, E., Hu, H., Yang, M., & Nie, L. (2021). Morphological mechanism allowing a parasitic leech, *Ozobranchus jantseanus* (Rhynchobdellida: Ozobranchidae), to survive in ultra-low temperatures. *Biology Open*, 10(7), bio058524. <https://doi.org/10.1242/bio.058524>
- Gutierrez-Ballesteros, E., & Wenrich, D. (1950). *Endolimax clevelandi*, n. Sp., from Turtles. *The Journal of Parasitology*, 36(5), 489. <https://doi.org/10.2307/3273178>

- Gutierrez-Liberato, G., Lotta-Arévalo, I., González, L., Vargas-Ramírez, M., Rodríguez-Fandiño, O., Cepeda, A., Ortiz-Moreno, M., & Matta, N. (2021). The genetic and morphological diversity of *Haemogregarina* infecting turtles in Colombia: Are mitochondrial markers useful as barcodes for these parasites? *Infection, Genetics and Evolution*, 95, 105040. <https://doi.org/10.1016/j.meegid.2021.105040>
- Guz, L., Nowakiewicz, A., Puk, K., Zięba, P., Gnat, S., & Matuszewski, Ł. (2021). Virulence and Antimicrobial Resistance Pattern of *Aeromonas* spp. Colonizing European Pond Turtles *Emys orbicularis* and Their Natural Environment. First Study from Poland. *Animals*, 11(10), 2772. <https://doi.org/10.3390/ani11102772>
- Hacioglu, N. (2012). A STUDY ON MICROFLORA IN ORAL AND CLOACAL OF FRESHWATER TURTLES. *Fresenius Environmental Bulletin*, 21(11).
- Hacioglu, N., & Tosunoglu, M. (2014). Determination of antimicrobial and heavy metal resistance profiles of some bacteria isolated from aquatic amphibian and reptile species. *Environmental Monitoring and Assessment*, 186(1), 407–413. <https://doi.org/10.1007/s10661-013-3385-y>
- Haetrakul, T., Lerthiranwong, M., Chanseu, N., & Lombardini, E. (2020). Severe, Fatal Spirorchiidiasis in Confiscated, Smuggled Black Pond Turtles (*Geoclemys hamiltonii*) in Thailand, a Case Report and Review of the Literature. *Journal of Herpetological Medicine and Surgery*, 30(3), 118–122. <https://doi.org/10.5818/18-07-164.1>
- Hansen, M., Pennanen, E., Bojesen, A., Christensen, H., & Bertelsen, M. (2016). *Testudinibacter aquarius* gen. Nov., sp. Nov., a member of the family Pasteurellaceae isolated from the oral cavity of freshwater turtles. *International Journal of Systematic and Evolutionary Microbiology*, 66(2), 567–573. <https://doi.org/10.1099/ijsem.0.000759>
- Harnoster, F., Svitin, R., & Du Preez, L. (2019). *Serpinema cayennensis* n. Sp. (Nematoda: Camallanidae), a parasite of the freshwater turtle *Rhinoclemmys punctularia* Daudin (Reptilia: Testudines: Geoemydidae) from French Guiana: Morphology and phylogenetic relationships with other turtle-parasitising camallanids. *Zootaxa*, 4679(1), 181–193. <https://doi.org/10.11646/zootaxa.4679.1.11>
- Harris, D., Damas-Moreira, I., Velo-Antón, G., Cordero-Rivera, A., & Perera, A. (2022). Blood parasite diversity (Apicomplexa: Haemogregarinidae) within the western populations of the European pond turtle *Emys orbicularis*. *Systematic Parasitology*, 99(3), 367–373. <https://doi.org/10.1007/s11230-022-10033-9>

- Harwood, V. J., Butler, J., Parrish, D., & Wagner, V. (1999). Isolation of Fecal Coliform Bacteria from the Diamondback Terrapin (*Malaclemys terrapin centrata*). *Applied and Environmental Microbiology*, 65(2), 865–867. <https://doi.org/10.1128/AEM.65.2.865-867.1999>
- Haskins, D., Hamilton, M., Jones, A., Finger, J., Bringolf, R., & Tuberville, T. (2017). Accumulation of coal combustion residues and their immunological effects in the yellowbellied slider (*Trachemys scripta scripta*). *Environmental Pollution*, 224, 810–819. <https://doi.org/10.1016/j.envpol.2017.01.048>
- Hassl, F., & Kleewein, A. (2022). Free-living, non-native pond sliders in Carinthia and their protozoan parasites: First recorded local occurrence of two remarkable *Eimeria* species. *Carinthia II*, 212(132), 79–84.
- Hastain, S., Buchy, J., Dombrowski, D., Womble, M., Armwood, A., & Gruber, E. (2023). What is your diagnosis? Ulcerative shell lesions from a diamond-backed terrapin (*Malaclemys terrapin*). *Veterinary Clinical Pathology*, vcp.13291. <https://doi.org/10.1111/vcp.13291>
- Hatternrath-Lehmann, T., Ossiboff, R., Burnell, C., Rauschenberg, C., Hynes, K., Burke, R., Bunting, E., Durham, K., & Gobler, C. (2017). The role of a PSP-producing *Alexandrium* bloom in an unprecedented diamondback terrapin (*Malaclemys terrapin*) mortality event in Flanders Bay, New York, USA. *Toxicon*, 129, 36–43. <https://doi.org/10.1016/j.toxicon.2017.02.006>
- Helke, K., & Poynton, S. (2005). *Myxidium mackiei* (Myxosporea) in Indo-Gangetic flap-shelled turtles *Lissemys punctata andersonii*: Parasite-host interaction and ultrastructure. *Diseases of Aquatic Organisms*, 63, 215–230. <https://doi.org/10.3354/dao063215>
- Helke, K., Cooper, T., Mankowski, J., & Poynton, S. (2006). DISSEMINATED VISCERAL COCCIDIOSIS IN INDO-GANGETIC FLAP-SHELLED TURTLES, *Lissemys punctata andersonii*. *Journal of Wildlife Diseases*, 42(4), 788–796. <https://doi.org/10.7589/0090-3558-42.4.788>
- Héritier, L., Valdeón, A., Sadaoui, A., Gendre, T., Ficheux, S., Bouamer, S., Kechemir-Issad, N., Du Preez, L., Palacios, C., & Verneau, O. (2017). Introduction and invasion of the red-eared slider and its parasites in freshwater ecosystems of Southern Europe: Risk assessment for the European pond turtle in wild environments. *Biodiversity and Conservation*, 26(8), 1817–1843. <https://doi.org/10.1007/s10531-017-1331-y>
- Héritier, L., Verneau, O., Breuil, G., & Meistertzheim, A.-L. (2016). The high resolution melting analysis (HRM) as a molecular tool for monitoring parasites of the wildlife. *Parasitology*, 144(5), 563–570. <https://doi.org/10.1017/S0031182016002183>



- Héritier, L., Verneau, O., Smith, K., Coetzer, C., & Du Preez, L. (2018). Demonstrating the value and importance of combining DNA barcodes and discriminant morphological characters for polystome taxonomy (Platyhelminthes, Monogenea). *Parasitology International*, 67(1), 38–46. <https://doi.org/10.1016/j.parint.2017.03.002>
- Hernandez, S., Maurer, J., Yabsley, M., Peters, V., Presotto, A., Murray, M., Curry, S., Sanchez, S., Gerner-Smidt, P., Hise, K., Huang, J., Johnson, K., Kwan, T., & Lipp, E. (2021). Free-Living Aquatic Turtles as Sentinels of *Salmonella* spp. For Water Bodies. *Frontiers in Veterinary Science*, 8, 674973. <https://doi.org/10.3389/fvets.2021.674973>
- Hewitt, R. (1940). *Haemoproteus metchnikovi* (Simond, 1901) from the Yellow-Bellied Terrapin (*Pseudemys elegans*). *The Journal of Parasitology*, 26(4), 275–278. <https://doi.org/10.2307/3272099>
- Hidalgo-Vila, J., Díaz-Paniagua, C., Pérez-Santigosa, N., Frutos-Escobar, C., & Herrero-Herrero, A. (2008). *Salmonella* in free-living exotic and native turtles and in pet exotic turtles from SW Spain. *Research in Veterinary Science*, 85(3), 449–452. <https://doi.org/10.1016/j.rvsc.2008.01.011>
- Hidalgo-Vila, J., Díaz-Paniagua, C., Ribas, A., Florencio, M., Pérez-Santigosa, N., & Casanova, J. (2009). Helminth communities of the exotic introduced turtle, *Trachemys scripta elegans* in southwestern Spain: Transmission from native turtles. *Research in Veterinary Science*, 86(3), 463–465. <https://doi.org/10.1016/j.rvsc.2008.08.003>
- Hidalgo-Vila, J., Martínez-Silvestre, A., Ribas, A., Casanova, J. C., Pérez-Santigosa, N., & Díaz-Paniagua, C. (2011). Pancreatitis Associated with the Helminth *Serpinema microcephalus* (Nematoda: Camallanidae) in Exotic Red-Eared Slider Turtles (*Trachemys scripta elegans*). *Journal of Wildlife Diseases*, 47(1), 201–205. <https://doi.org/10.7589/0090-3558-47.1.201>
- Hidalgo-Vila, J., Martínez-Silvestre, A., Pérez-Santigosa, N., León-Vizcaíno, L., & Díaz-Paniagua, C. (2020). High prevalence of diseases in two invasive populations of red-eared sliders (*Trachemys scripta elegans*) in southwestern Spain. *Amphibia-Reptilia*, 41(4), 509–518. <https://doi.org/10.1163/15685381-bja10021>
- Hidalgo-Vila, J., Ribas, A., Florencio, M., Pérez-Santigosa, N., & Casanova, J. C. (2006). *Falcaustra donanaensis* sp. nov. (Nematoda: Kathliniidae) a parasite of *Mauremys leprosa* (Testudines, Bataguridae) in Spain. *Parasitology Research*, 99(4), 410–413. <https://doi.org/10.1007/s00436-006-0176-1>



- Hoff, G., & Trainer, D. (1973). Arboviruses in Reptiles: Isolation of a Bunyamwera Group Virus from a Naturally Infected Turtle. *Journal of Herpetology*, 7(2), 55. <https://doi.org/10.2307/1563201>
- Hoh, D. Z., Lee, H.-H., Wada, N., Liu, W.-A., Lu, M. R., Lai, C.-K., Ke, H.-M., Sun, P.-F., Tang, S.- L., Chung, W.-H., Chen, Y.-L., Chung, C.-L., & Tsai, I. (2022). Comparative genomic and transcriptomic analyses of trans-kingdom pathogen *Fusarium solani* species complex reveal degrees of compartmentalization. *BMC Biology*, 20(1), 236. <https://doi.org/10.1186/s12915-022-01436-7>
- Hossain, S., & Heo, G.-J. (2021). Pet-turtles: A potential source of human pathogenic bacteria. *Archives of Microbiology*, 203(7), 3785–3792. <https://doi.org/10.1007/s00203-021-02428-x>
- Hossain, S., Wimalasena, S., Zoysa, M., & Heo, G.-J. (2017). Prevalence of *Citrobacter* spp. From Pet Turtles and Their Environment. *Journal of Exotic Pet Medicine*, 26(1), 7–12. <https://doi.org/10.1053/j.jepm.2016.10.004>
- Hoyer, L. L., Hogan, E. K., Adamovicz, L., Allender, M. C., Terio, K. A., & Hernandez, A. G. (2023). Genome sequence of *Emydomyces testavorans* type strain 16-2883 (ATCC TSD-145), an onygenalean fungus associated with freshwater aquatic turtle shell lesions. *Microbiology Resource Announcements*, e00222-23. <https://doi.org/10.1128/MRA.00222-23>
- Hunter, W. (1961). A new monostome, *Pleurogonius malaclemys* n.sp. (Trematoda: Pronocephalidae) from Beaufort, North Carolina. *Proceedings of the Helminthological Society of Washington*, 28(2), 111–114.
- Hunter, W. (1967). Notes on the life history of *Pleurogonius malaclemys* Hunter, 1961 (Trematoda: Pronocephalidae) from Beaufort, North Carolina, with a description of the cercaria. *Proceedings of the Helminthological Society of Washington*, 34(1), 33–40.
- Hussain, H. (2015). Survey of external parasites on the turtles *Emydura macquarii* present in fish breeding ponds in AL-musaib Technical Institute *Journal of Kerbala University*, 13(3), 46– 49.
- Ianni, F., Dodi, P. L., Cabassi, C. S., Pelizzone, I., Sala, A., Cavarani, S., Parmigiani, E., Quintavalla, F., & Taddei, S. (2015). Conjunctival flora of clinically normal and diseased turtles and tortoises. *BMC Veterinary Research*, 11(1), 91. <https://doi.org/10.1186/s12917-015-0405-x>

- Ibáñez, A., Marzal, A., González-Blázquez, M., López, P., & Martín, J. (2015). Basking Activity is Modulated by Health State but is Constrained by Conspicuousness to Predators in Male Spanish Terrapins. *Ethology*, 121(4), 335–344. <https://doi.org/10.1111/eth.12342>
- Iglesias, R., García-Estévez, J., Ayres, C., Acuña, A., & Cordero-Rivera, A. (2015). First reported outbreak of severe spirorchidiasis in *Emys orbicularis*, probably resulting from a parasite spillover event. *Diseases of Aquatic Organisms*, 113(1), 75–80. <https://doi.org/10.3354/dao02812>
- Inirah, C., Azlan, C., Teoh, H., Donny, Y., & Jesse, F. (2017). PNEUMONIA AND CONCURRENT EGGS RETENTION IN A RIVER TERRAPIN. *J. Vet. Malaysia* 29 (1):13-17
- Innis, C., Conley, K., Gibbons, P., Stacy, N., Walden, H., Martelli, P., Luz, S., Krishnasamy, K., Hagen, C., Sykes, J., Acosta, D., Tabug, K., O'Connor, M., Wilson, V., Liu, J., Géczy, C., Nga, N., Sebro, I., Koeth, S., ... Schoppe, S. (2022). Veterinary Observations and Biological Specimen Use after a Massive Confiscation of Palawan Forest Turtles (*Siebenrockiella leytensis*). *Chelonian Conservation and Biology*, 21(1). <https://doi.org/10.2744/CCB-1510.1>
- Jacobson, E., Cheatwood, J., & Maxwell, L. (2000). Mycotic diseases of reptiles. *Seminars in Avian and Exotic Pet Medicine*, 9(2), 94–101. <https://doi.org/10.1053/AX.2000.4621>
- Jacobson, E., Ossiboff, R., Paquet-Durand, I., Childress, A., Barrett, H., Marlin, J., McAllister, C., & Walden, H. (2022). A New Coccidian (Apicomplexa: Eimeriidae) in the Critically Endangered Central American River Turtle (*Dermatemys mawii*) in Belize. *Journal of Parasitology*, 108(1). <https://doi.org/10.1645/21-44>
- Jakes, K. A., O'Donoghue, P., Munro, M., & Adlard, R. (2001). HEMOPROTOZOA OF FRESHWATER TURTLES IN QUEENSLAND. *Journal of Wildlife Diseases*, 37(1), 12–19. <https://doi.org/10.7589/0090-3558-37.1.12>
- Javanbakht, H., & Sharifi, M. (2014). Prevalence and intensity of *Haemogregarina stepanowi* (Apicomplexa: Haemogregarinidae) in two species of freshwater turtles (*Mauremys caspica* and *Emys orbicularis*) in Iran. *Journal of Entomology and Zoology Studies*, 2(4), 155–158.
- Jesus, R. F., Cardoso, E. L., Willkens, Y., & Furtado, A. P. (2020). “Long time no see”: Redescription of *Orientatractis leiperi* (Nematoda: Atractidae) parasite of *Podocnemis unifilis* (Testudines: Podocnemididae) from Pará State, Brazil. *Revista Mexicana de Biodiversidad*.

- Jesus, R. F., Willkens, Y., Santos, J. N., & Melo, F. T. V. (2023b). A NEW SPECIES OF *Pneumoatractis* (COSMOCERCOIDEA: ATRACTIDAE) FROM TWO SPECIES OF FRESHWATER TURTLES FROM THE BRAZILIAN AMAZON. *The Journal of Parasitology*, 109(3), 181–186.
- Jesus, R., Oliveira, S., Ramos, I., & Melo, F. (2023). A new species of *Orientatractis* (Nematoda: Cosmocercoidea: Atractidae) parasite of Yellow-Spotted Amazon River Turtle, *Podocnemis unifilis* Troschel, 1848 (Testudines: Podocnemididae) in Brazilian Amazon. *International Journal for Parasitology: Parasites and Wildlife*, 22, 108–112. <https://doi.org/10.1016/j.ijppaw.2023.09.006>
- Jesus, R., Santos, A., Nandyara, B., Santos, J., & Melo, F. (2022). *Vogtnema asymmetrica* n. gen., n. sp. (Nematoda: Cosmocercoidea: Atractidae) parasite of *Rhinoclemmys punctularia* (Daudin) (Testudines: Geoemydidae) from eastern Amazon, Brazil. *Systematic Parasitology*, 99(6), 761–769. <https://doi.org/10.1007/s11230-022-10065-1>
- Johnson, C., Griffith, J., Tenorio, P., Hytrek, S., & Lang, C. (1998). Fatal Trematodiasis in Research Turtles. *Laboratory Animal Science*, 48(4), 340–343.
- Jonhson, S., Adamovicz, L., Kessler, E., & Allender, M. (2022). *Mycoplasma* sp. Detection in the State Endangered Illinois Alligator Snapping Turtle (*Macrochelys temminckii*). *Journal of Herpetological Medicine and Surgery*, 32(4), 277–280. <https://doi.org/10.5818/JHMS-D-21-00041>
- Jungwirth, N., Bodewes, R., Osterhaus, A., Baumgärtner, W., & Wohlsein, P. (2014). First report of a new alphaherpesvirus in a freshwater turtle (*Pseudemys concinna concinna*) kept in Germany. *Veterinary Microbiology*, 170(3–4), 403–407. <https://doi.org/10.1016/j.vetmic.2014.02.029>
- Junker, K., & Boomker, J. (2006). A check-list of the pentastomid parasites of crocodilians and freshwater chelonians. *Onderstepoort Journal of Veterinary Research*, 73(1).
- Junker, K., & Boomker, J. (2022). Description of *Pelonia africana* n. G., n. Sp. (Pentastomida: Sebekidae) from the lungs of *Pelomedusa subrufa* and *Pelusios sinuatus* (Chelonia) in South Africa. *Onderstepoort Journal of Veterinary Research*, 69, 53–59.
- Junker, K., Riley, J., & Boomker, J. (2003). Redescription of *Diesingia megastoma* (Diesing, 1836) Sambon, 1922, a pentastomid parasite from the South American terrapin *Hydromedusa tectifera* Cope. *Systematic Parasitology*, 56(3), 211–218. <https://doi.org/10.1023/B:SYPA.0000003808.87067.9e>

- Kambayashi, C., Hemmi, K., & Kurabayashi, A. (2021). First record of *Amblyomma testudinarium* Koch, 1844 (Acari: Ixodidae) parasitising Reeves' Pond Turtle, *Mauremys reevesii* (Gray, 1831) (Testudines: Geoemydidae), in Japan. *Herpetology Notes*, 14, 613–615.
- Kang, C.-Q., Meng, Q.-Y., Dang, W., Shao, Y.-J., & Lu, H.-L. (2022). Effects of chronic exposure to the fungicide vinclozolin on gut microbiota community in an aquatic turtle. *Ecotoxicology and Environmental Safety*, 239, 113621. <https://doi.org/10.1016/j.ecoenv.2022.113621>
- Köbölkuti, L. B., Czirják, G. Á., & Spînu, M. (2016). EFFECTS OF MALNUTRITION AND IMPROPER CAPTIVE MAINTENANCE ON EUROPEAN POND TURTLE (*Emys orbicularis*): A CASE REPORT. *J. Anim. Plant Sci.*, 26(3), 874–879.
- Koch, R., Gustafson, K., & Bolek, M. (2023). Observations on Turtle Acanthocephalan Abnormalities from Oklahoma, U.S.A. *Comparative Parasitology*, 90(2), 95–100. <https://doi.org/10.1654/1525-2647-90.2.95>
- Kolesnik, E., Obiegala, A., & Marschang, R. E. (2017). Detection of *Mycoplasma* spp., herpesviruses, topiviruses, and ferlaviruses in samples from chelonians in Europe. *Journal of Veterinary Diagnostic Investigation*, 29(6), 820–832. <https://doi.org/10.1177/1040638717722387>
- Koo, K., Yun, K., & Jang, Y. (2022). *Ozobranchus jantseanus* (Clitellata: Ozobranchidae) from Reeve's Turtle, *Mauremys reevesii*: New Annelid Fauna in Korea. *The Korean Journal of Parasitology*, 60(3), 213–215. <https://doi.org/10.3347/kjp.2022.60.3.213>
- Košel, V., Mock, A., & Novotny, M. (2004). The first record of the leech *Placobdella costata* (Hirudinea) in Slovakia. *Biologia*, 59, 23–24.
- Kumar, R., Rishika, V., & Raj, M. (2022). A case study of *Paecilomyces lilacinus* reported in Indian soft shelled turtle and red-eared slider. *The Pharma Innovation Journal*, 11(4), 1418–1419.
- Kundu, S., Kumar, V., Tyagi, K., Pakrashi, A., Laskar, B., & Chandra, K. (2019). DNA Barcoding Reveals Association of Glossiphoniidae Species on Endangered Freshwater Turtles in Northeast India. *Acta Parasitologica*, 64(1), 213–217. <https://doi.org/10.2478/s11686-018-00023-7>
- Kundu, S., Maity, P., Rizvi, A., Tyagi, K., Chandra, K., & Kumar, V. (2020). Detection of helminth parasites in commercialized turtles: Threats to native Testudines in northeast India. 120.

- Kuroki, T., Ito, K., Ishihara, T., Furukawa, I., Kaneko, A., Suzuki, Y., Seto, J., & Kamiyama, T. (2015). Turtle-Associated *Salmonella* Infections in Kanagawa, Japan. *Japanese Journal of Infectious Diseases*, 68(4), 333–337. <https://doi.org/10.7883/yoken.JJID.2014.490>
- Kuzmin, Y., Tkach, V., Snyder, S., & Maier, M. (2009). *Camallanus tuckeri* n. sp. (Nematoda, Camallanidae) from Freshwater Turtles (Pleurodira: Chelidae), in the Kimberley, Western Australia. *Comparative Parasitology*, 76(2), 133–140. <https://doi.org/10.1654/4391.1>
- Kvist, S., Utevsky, S., Marrone, F., Ben Ahmed, R., Gajda, Ł., Grosser, C., Huseynov, M., Jueg, U., Khomenko, A., Oceguera-Figueroa, A., Pešić, V., Pupins, M., Rouag, R., Sağlam, N., Świątek, P., Trontelj, P., Vecchioni, L., & Müller, C. (2022). Extensive sampling sheds light on species-level diversity in Palearctic *Placobdella* (Annelida: Clitellata: Glossiphoniiformes). *Hydrobiologia*, 849(5), 1239–1259. <https://doi.org/10.1007/s10750-021-04786-5>
- Lafortune, M., Wellehan, J., Terrell, S., Jacobson, E., Heard, D., & Kimbrough, J. W. (2005). Shelland Systemic Hyalohyphomycosis in Fly River Turtles, *Carettochelys insculpta*, caused by *Paecilomyces lilacinus*. *Journal of Herpetological Medicine and Surgery*, 15(2), 15–19. <https://doi.org/10.5818/1529-9651.15.2.15>
- Laghzaoui, E.-M., Abbad, A., & El Mouden, E. (2020). Host-parasite association of *Placobdella costata* (Glossiphoniidae: Hirudinea) and *Mauremys leprosa* (Geoemydidae: Testudinoidea) in aquatic ecosystems of Morocco. *Parasitology Research*, 119(10), 3459– 3467. <https://doi.org/10.1007/s00436-020-06809-x>
- Laghzaoui, E.-M., Perera, A., Harris, D., & El Mouden, E. (2021a). Characterization and identification of haemogregarine hemoparasites (Apicomplexa: Adeleina: Hepatozoidae) in natural populations of *Mauremys leprosa leprosa* and *M. leprosa saharica* from Morocco. *Systematic Parasitology*, 98(5–6), 547–557. <https://doi.org/10.1007/s11230-021-09995-z>
- Laghzaoui, E.-M., Perera, A., Harris, D., & Mouden, E. (2021b). Putative intranuclear coccidium in *Mauremys leprosa* (Schweigger) from Morocco. *Folia Parasitologica*, 68. <https://doi.org/10.14411/fp.2021.021>
- Lainson, R., & Naiff, R. (1998). *Eimeria peltoccephali* n. Sp., (Apicomplexa:Eimeriidae) from the Freshwater Turtle *Peltoccephalus dumerilianus* (Chelonia: Pelomusidae) and *Eimeria molossi* n. Sp., from the Bat, *Molossus ater* (Mammalia: Chiroptera). *Memórias Do Instituto Oswaldo Cruz*, 93(1), 81–90. <https://doi.org/10.1590/S0074-02761998000100015>

- Lambert, M., Hernández-Gómez, O., Krohn, A., Mutlow, A., Patterson, L., Rosenblum, E., Timmer, M., Willis, J., & Bushell, J. (2021). Turtle Shell Disease Fungus (*Emydomyces testavorans*): First Documented Occurrence in California and Prevalence in Free-Living Turtles. *Ichthyology & Herpetology*, 109(4), 958–962.
- Laovechprasit, W., Young, K., Stacy, B., Tillis, S., Ossiboff, R., Vann, J., Subramaniam, K., Agnew, D., Zhang, J., Whitaker, S., Walker, A., Orgill, A., Howell, L., Shaver, D., & Stanton, J. (2023). Piscichuviral encephalitis in marine and freshwater chelonians: First evidence of jingchuviral disease. *BioRxiv*. <https://doi.org/10.1101/2023.02.24.528524>
- Leineweber, C., Müller, E., & Marschang, R. (2021). Herpesviruses in Captive Chelonians in Europe Between 2016 and 2020. *Frontiers in Veterinary Science*, 8, 733299. <https://doi.org/10.3389/fvets.2021.733299>
- Lenis, C., & García-Prieto, L. (2009). *Polystomoides magdalenensis* n. sp. (Monogenoidea: Polystomatidae), a Parasite of Buccal Cavity of *Trachemys callirostris callirostris* (Testudinata: Emydidae) from Colombia. *Journal of Parasitology*, 95(4), 850–854. <https://doi.org/10.1645/GE-1977.1>
- Lenis, C., & Vélez, I. (2011). Digeneans in *Trachemys callirrostris callirrostris* and *Podocnemis lewyana* (Testudinata) from the Magdalena River, Colombia: Description of *Pseudonematophila* n. Gen. And amendment of *Nematophila* Travassos, 1934 (Cladorchiidae: Schizamphistominae). *Zootaxa*, 3095, 49–65.
- Lewis, N., Zarate, B., Wnek, J., & Wurst, B. (2023). HEALTH ASSESSMENT OF WILD NORTHERN DIAMOND-BACKED TERRAPINS (*Malaclemys terrapin terrapin*) IN NEW JERSEY, USA. *Journal of Wildlife Diseases*, 59(2), 234–244. <https://doi.org/10.7589/JWD-D22-00027>
- Li, H., Meng, Q., Wang, W., Mo, D., Dang, W., & Lu, H. (2022). Gut Microbial Composition and Liver Metabolite Changes Induced by Ammonia Stress in Juveniles of an Invasive Freshwater Turtle. *Biology*, 11(9), 1315. <https://doi.org/10.3390/biology11091315>
- Lignon, J., Cohen, S., Justo, M., Du Preez, L., Comarella, C., Nishimaru, R., Souza, P., Ataíde, M., Müller, D., Brun, M., & Monteiro, S. (2023). New species of *Polystomoides* (Monogenoidea: Polystomatidae) parasitizing the urinary bladder of a freshwater turtle in Brazil. *Revista Brasileira de Parasitologia Veterinária*, 32(3), e007823. <https://doi.org/10.1590/s1984-29612023045>

- Lindemann, D., Allender, M., Thompson, D., Adamovicz, L., & Dzhaman, E. (2018). Development and validation of a quantitative PCR assay for detection of Emydoidea herpesvirus 1 in free-ranging Blanding's turtles (*Emydoidea blandingii*). *Journal of Virological Methods*, 254, 40–45. <https://doi.org/10.1016/j.jviromet.2018.01.006>
- Lindemann, D., Allender, M., Thompson, D., Glowacki, G. A., Newman, E., Adamovicz, L., & Smith, R. (2019). EPIDEMIOLOGY OF EMYDOIDEA HERPESVIRUS 1 IN FREE-RANGING BLANDING'S TURTLES (*Emydoidea blandingii*) FROM ILLINOIS. *Journal of Zoo and Wildlife Medicine*, 50(3), 547–556. <https://doi.org/10.1638/2018-0074>
- Lindtner-Knific, R., Vergles-Rataj, A., Vlahović, K., Zrimšek, P., & Dovč, A. (2013). Prevalence of antibodies against *Leptospira* sp. In snakes, lizards and turtles in Slovenia. *Acta Veterinaria Scandinavica*, 55(1), 65. <https://doi.org/10.1186/1751-0147-55-65>
- Littlewood, D. T. J., Rohde, K., & Clough, K. A. (1997). Parasite speciation within or between host species?—Phylogenetic evidence from site-specific polystome monogeneans. *International Journal for Parasitology*, 27(11), 1289–1297. [https://doi.org/10.1016/S0020-7519\(97\)00086-6](https://doi.org/10.1016/S0020-7519(97)00086-6)
- Liu, D., Wilson, C., Hearlson, J., Singleton, J., Thomas, R. B., & Crupper, S. S. (2013). PREVALENCE OF ANTIBIOTIC-RESISTANT GRAM-NEGATIVE BACTERIA ASSOCIATED WITH THE RED-EARED SLIDER (*Trachemys scripta elegans*). *Journal of Zoo and Wildlife Medicine*, 44(3), 666–671. <https://doi.org/10.1638/2012-0252R1.1>
- Liu, T., Han, Y., Chen, S., & Zhao, H. (2019). Global characterization and expression analysis of interferon regulatory factors in response to *Aeromonas hydrophila* challenge in Chinese soft-shelled turtle (*Pelodiscus sinensis*). *Fish & Shellfish Immunology*, 92, 821–832. <https://doi.org/10.1016/j.fsi.2019.07.013>
- Liu, T., Wu, Y., Han, Y., Liu, Q., Chen, S., & Zhao, H. (2020). Genome-wide characterization of TNF receptor-associated factors in the Chinese soft-shelled turtle *Pelodiscus sinensis* and their expression profiling in response to *Aeromonas hydrophila* challenge. *Fish & Shellfish Immunology*, 101, 88–98. <https://doi.org/10.1016/j.fsi.2020.03.049>
- Liuzzo, M., Alfonso, G., Beli, E., Arculeo, M., & Marrone, F. (2018). First record of the alien leech *Myzobdella lugubris* Leidy, 1851 (Hirudinea, Piscicolidae) in the Palearctic. *Limnetica*, 37, 311–318. <https://doi.org/10.23818/limn.37.25>

- López-Jiménez, S., & Ocegüera-Figueroa, A. (2009). New Species of Rhynchobdellid Leech (Hirudinea: Glossiphoniidae): A Parasite of Turtles from Chiapas, Mexico. *Journal of Parasitology*, 95(6), 1356–1359. <https://doi.org/10.1645/GE-2128.1>
- Lyu, S., Yuan, X., Zhang, H., Shi, W., Hang, X., Liu, L., Cao, Z., & Wu, Y. (2019). Complete genome sequence and analysis of a new lethal arterivirus, *Trionyx sinensis* hemorrhagic syndrome virus (TSHSV), amplified from an infected Chinese softshell turtle. *Archives of Virology*, 164(10), 2593–2597. <https://doi.org/10.1007/s00705-019-04324-8>
- Magnino, S., Colin, P., Dei-Cas, E., Madsen, M., McLauchlin, J., Nöckler, K., Prieto Maradona, M., Tsigarida, E., Vanopdenbosch, E., & Van Peteghem, C. (2009). Biological risks associated with consumption of reptile products. *International Journal of Food Microbiology*, 134(3), 163–175. <https://doi.org/10.1016/j.ijfoodmicro.2009.07.001>
- Mamedova, S., & Karanis, P. (2021). *Cryptosporidium* spp. Infections in livestock and wild animals in Azerbaijan territory. *Journal of Water and Health*, 19(4), 545–562. <https://doi.org/10.2166/wh.2021.050>
- Maričić, M., Danon, G., Faria, J., & Harris, D. (2023). Molecular Screening of *Haemogregarine* Hemoparasites (Apicomplexa: Adeleorina: Haemogregarinidae) in Populations of Native and Introduced Pond Turtles in Eastern Europe. *Microorganisms*, 11(4), 1063. <https://doi.org/10.3390/microorganisms11041063>
- Marin, C., Ingresa-Capaccioni, S., González-Bodi, S., Marco-Jiménez, F., & Vega, S. (2013). Free-Living Turtles Are a Reservoir for *Salmonella* but Not for *Campylobacter*. *PLoS ONE*, 8(8), e72350. <https://doi.org/10.1371/journal.pone.0072350>
- Marin, C., Martín-Maldonado, B., Cerdà-Cuellar, M., Sevilla-Navarro, S., LorenzoRebenaque, L., Montoro-Dasi, L., Manzanares, A., Ayats, T., Mencía-Gutiérrez, A., Jordá, J., González, F., Rojo-Solís, C., Barros, C., García-Párraga, D., & Vega, S. (2022). Antimicrobial Resistant *Salmonella* in Chelonians: Assessing Its Potential Risk in Zoological Institutions in Spain. *Veterinary Sciences*, 9(6), 264. <https://doi.org/10.3390/vetsci9060264>
- Marrone, F., Sacco, F., Kehlmaier, C., Arizza, V., & Arculeo, M. (2016). Some like it cold: The glossiphoniid parasites of the Sicilian endemic pond turtle *Emys trinacris* (Testudines, Emydidae), an example of ‘parasite inertia’? *Journal of Zoological Systematics and Evolutionary Research*, 54(1), 60–66. <https://doi.org/10.1111/jzs.12117>



- Martínez-Ríos, M., Martín-Torrijos, L., & Diéguez-Uribeondo, J. (2022). The invasive alien red-eared slider turtle, *Trachemys scripta*, as a carrier of STEF-disease pathogens. *Fungal Biology*, 126(2), 113–121. <https://doi.org/10.1016/j.funbio.2021.11.003>
- Martínez-Silvestre, A., Guinea, D., Ferrer, D., & Pantchev, N. (2015). Parasitic Enteritis Associated with the Camallanid Nematode *Serpinema microcephalus* in Wild Invasive Turtles (*Trachemys*, *Pseudemys*, *Graptemys*, and *Ocadia*) in Spain. *Journal of Herpetological Medicine and Surgery*, 25(1–2), 48. <https://doi.org/10.5818/1529-9651-25.1.48>
- Martínez-Silvestre, A., Verdaguer, I., Vidal, F., Fortuño, L., Franch, M. A., Soler, J., & Velarde, R. (2017). High Mortality Associated with Thyroid Hyperplasia in European Pond Turtles, *Emys orbicularis* (L., 1758) (Emydidae) in a Breeding Facility at the Ebro Delta, NE Spain. *ACTA ZOOLOGICA BULGARICA*, 10, 85–89.
- Marzal, A., Ibáñez, A., González-Blázquez, M., López, P., & Martín, J. (2017). Prevalence and genetic diversity of blood parasite mixed infections in Spanish terrapins, *Mauremys leprosa*. *Parasitology*, 144(11), 1449–1457. <https://doi.org/10.1017/S0031182017000889>
- Mascarenhas, C. S., & Müller, G. (2017). *Camallanus emydidius* n. sp. (Nematoda: Camallanidae) in *Trachemys dorbigni* (Duméril & Bibron, 1835) (Testudines: Emydidae) from Southern Brazil. *International Journal for Parasitology: Parasites and Wildlife*, 6(2), 108–114. <https://doi.org/10.1016/j.ijppaw.2017.04.004>
- Mascarenhas, C. S., Bernardon, F. F., & Müller, G. (2016). Intestinal digeneans of freshwater turtles *Phrynops hilarii* and *Acanthochelys spixii* (Testudines: Chelidae) from southern Brazil. *Revista Mexicana de Biodiversidad*, 87(1), 35–41. <https://doi.org/10.1016/j.rmb.2016.01.010>
- Mascarenhas, C., & Müller, G. (2015a). *Spiroxys contortus* (Gnathostomatidae) and *Falcaustra affinis* (Kathlaniidae) from *Trachemys dorbigni* (Emydidae) in Southern Brazil. *Comparative Parasitology*, 82(1), 129–136. <https://doi.org/10.1654/4726.1>
- Mascarenhas, C., & Müller, G. (2015b). Third-stage larvae of the enoplid nematode *Diectophyme renale* (Goeze, 1782) in the freshwater turtle *Trachemys dorbigni* from southern Brazil. *Journal of Helminthology*, 89(5), 630–635. <https://doi.org/10.1017/S0022149X14000364>
- Mascarenhas, C., Chaviel, B., Bernardon, F., Wolter, J., Coimbra, M., & Müller, G. (2022). Gastrointestinal helminths associated with three species of freshwater turtles in the Pampa

biome, southern Brazil. *Parasitology Research*, 121(1), 225–233.  
<https://doi.org/10.1007/s00436-021-07361-y>

Mascarenhas, C., Silva, R., & Muller, G. (2018). Temnocephalids on *Trachemys dorbigni* (Duméril & Bibron, 1835) (Testudines, Emydidae): Implications of anthropogenic environments and turtle's genders in symbiotic relationships. *Neotropical Helminthology*, 12(2), 201–211.

Mascarenhas, C., Silva, R., & Müller, G. (2021). Helminth's assemblage of *Trachemys dorbigni* (Testudines: Emydidae) in southern Brazil: implications of anthropogenic environments and host's genders. *Iheringia. Série Zoologia*, 111, e2021011. <https://doi.org/10.1590/1678-4766e2021011>

Mascarenhas, C., Souza, J., Coimbra, M., & Müller, G. (2013). Nematode parasites of Chelidae (Testudines) from Southern Brazil. *Parasitology Research*, 112(9), 3365–3368.  
<https://doi.org/10.1007/s00436-013-3503-3>

McAllister, C. T., & Upton, S. J. (1989). The *Coccidia* (Apicomplexa: Eimeriidae) of Testudines, with descriptions of three new species. *Canadian Journal of Zoology*, 67(10), 2459–2467.  
<https://doi.org/10.1139/z89-347>

McAllister, C., & Robison, H. (2022). First Report of *Haemogregarina* sp. (Apicomplexa: Haemogregarinidae) from Razor-Backed Musk Turtle, *Sternotherus carinatus* (Testudines: Kinosternidae), from Oklahoma, with a Summary of Hematozoans from the Family Kinosternidae. *Proceedings of the Oklahoma Academy of Science*, 102, 68–72.

McAllister, C., Bursey, C., & Robison, H. (2021). Noteworthy Records of Helminth Parasites (Monogenea, Trematoda, Cestoda, Nematoda, Acanthocephala) from Select Herpetofauna (Anura, Testudines, Ophidia) from McCurtain County, Oklahoma. *Proceedings of the Oklahoma Academy of Science*, 101, 101–108.

McAllister, C., Bursey, C., Robison, H., Connior, M., & Barger, M. (2014). *Haemogregarina* sp. (Apicomplexa: Haemogregarinidae), *Telorchis attenuata* (Digenea: Telorchidae) and *Neoechinorhynchus emydis* (Acanthocephala: Neoechinorhynchidae) from Map Turtles (*Graptemys* spp.), in Northcentral Arkansas. *Journal of the Arkansas Academy of Science*, 68.  
<https://doi.org/10.54119/jaas.2014.6823>

McAllister, C., Bursey, C., Trauth, S., & Barger, M. (2018). Endoparasites (Apicomplexa, Monogeneoidea, Trematoda, Cestoda, Nematoda, Acanthocephala) from Eleven Reptiles (Testudines: Lacertilia: Ophidia) of McCurtain County, Oklahoma, Including the First Report

of the Endogenous Stages of *Eimeria robisoni* (Eimeriidae). Proceedings of the Oklahoma Academy of Science, 98, 101–111.

McAllister, C., Connior, M., Robison, H., Fayton, T., Tumilson, R., & Trauth, S. (2016). Hematozoan Parasites (Apicomplexa, Kinetoplastida) of Seven Arkansas Reptiles (Testudines, Ophidia). Journal of the Arkansas Academy of Science, 70. <https://doi.org/10.54119/jaas.2016.7038>

McKenna, S., Betts, D., Pong, W., Govedich, F., & Barton, D. (2005). A redescription of the australian leech *Placobdelloides bancrofti* with new records of its distribution. The Journal of Parasitology, 91(1), 117–121.

McKnight, D., Wirth, W., Schwarzkopf, L., & Nordberg, E. (2021). Leech removal is not the primary driver of basking behavior in a freshwater turtle. Ecology and Evolution, 11(16), 10936–10946. <https://doi.org/10.1002/ece3.7876>

McKnight, D., Zenger, K., Alford, R., & Huerlimann, R. (2020). Microbiome diversity and composition varies across body areas in a freshwater turtle. Microbiology, 166(5), 440–452. <https://doi.org/10.1099/mic.0.000904>

Meng, Q.-Y., Mo, D.-M., Li, H., Wang, W.-L., & Lu, H.-L. (2023). Divergent responses in the gut microbiome and liver metabolome to ammonia stress in three freshwater turtles. Science of The Total Environment, 859, 160372. <https://doi.org/10.1016/j.scitotenv.2022.160372>

Merola, C., Hauber, L., Graham, E., Ossiboff, R., & DiGeronimo, P. M. (2022). Pathology in Practice. Journal of the American Veterinary Medical Association, 259(S2), 1–4. <https://doi.org/10.2460/javma.20.06.0323>

Meyer, L., Du Preez, L., Bonneau, E., Héritier, L., Quintana, M., Valdeón, A., Sadaoui, A., Kechemir-Issad, N., Palacios, C., & Verneau, O. (2015). Parasite host-switching from the invasive American red-eared slider, *Trachemys scripta elegans*, to the native Mediterranean pond turtle, *Mauremys leprosa*, in natural environments. Aquatic Invasions, 10(1), 79–91. <https://doi.org/10.3391/ai.2015.10.1.08>

Miclăuș, V., Gal, A., Cătoi, C., & Mihalca, A. (2014). Severe granulomatous gastric lesions following migration of *Spiroxys contortus* larvae (Nematoda: Spirurida) in European pond turtles, *Emys orbicularis*. Helminthologia, 51(3), 225–229. <https://doi.org/10.2478/s11687-014-0233-8>

Miclăuș, V., Mihalca, A., Oana, L., Rus, V., & Cadar, D. (2008). Gastric parasitism with fullaged *Spiroxys contortus* of the European pond turtle (*Emys orbicularis*). Histological aspects.

Bulletin of University of Agricultural Sciences and Veterinary Medicine Cluj-Napoca., 65(2), 84–86.

Mihalca, A. D., Racka, K., Gherman, C., & Ionescu, D. T. (2008). Prevalence and intensity of blood apicomplexan infections in reptiles from Romania. *Parasitology Research*, 102(5), 1081–1083. <https://doi.org/10.1007/s00436-008-0912-9>

Mihalca, A., Dumitrache, M., Magdaş, C., Gherman, C., Domşa, C., Mircean, V., Ghira, I., Pocora, V., Ionescu, D., Barabási, S., Cozma, V., & Sándor, A. (2012). Synopsis of the hard ticks (Acari: Ixodidae) of Romania with update on host associations and geographical distribution. *Experimental and Applied Acarology*, 58(2), 183–206. <https://doi.org/10.1007/s10493-012-9566-5>

Mitchell, J., & McAvoy, B. (1990). Enteric Bacteria in Natural Population of Freshwater Turtles in Virginia. *Virginia Journal of Science*, 41(3), 233–242.

Mitura, A., Niemczuk, K., Zaręba, K., Zając, M., Laroucau, K., & Szymańska-Czerwińska, M. (2017). Free-living and captive turtles and tortoises as carriers of new *Chlamydia* spp. *PLOS ONE*, 12(9), e0185407. <https://doi.org/10.1371/journal.pone.0185407>

Mohammad, E., Al-Shammari, N., & Bannai, M. (2021). Enterobacteriaceae opportunism isolated from Caspian Turtle *Mauremys caspica* (Gmelin, 1774) suffering from a fracture of the external shell, East of Al-Hammar Marshes, Iraq. *Mesopotamian Journal of Marine Sciences*, 35(1), 35–42. <https://doi.org/10.58629/mjms.v35i1.29>

Molla, S., Bandyopadhyay, P., & Gurelli, G. (2015). Description of a New Haemogregarine, *Haemogregarina sundarbanensis* n. sp. (Apicomplexa: Haemogregarinidae) from Mud Turtle of Sundarban Regions, West Bengal, India. *Turkish Journal of Parasitology*, 39(2), 131–134. <https://doi.org/10.5152/tpd.2015.3924>

Molla, S., Probir, B., & GozdeGurelli, G. (2013). On the Occurrence of a Haemogregarinae (Apicomplexa) Parasite from Freshwater Turtles of South 24 Parganas, West Bengal, India. *Turkish Journal of Parasitology*, 37(2), 118–122. <https://doi.org/10.5152/tpd.2013.27>

Moravec, F., & Vargas-Vázquez, J. (1998). Some endohelminths from the freshwater turtle *Trachemys scripta* from Yucatan, Mexico. *Journal of Natural History*, 32(3), 455–468. <https://doi.org/10.1080/00222939800770241>

Mullin, D., White, R., Lentini, A., Brooks, R., Bériault, K., & Litzgus, J. (2020). Predation and disease limit population recovery following 15 years of headstarting an endangered

freshwater turtle. Biological Conservation, 245, 108496.  
<https://doi.org/10.1016/j.biocon.2020.108496>

Murphy, J. (2016). Conservation Initiatives and Studies on Tortoises, Turtles, and Terrapins Mostly in Zoos and Aquariums. Part II— Suborder Pleurodira, Suborder Cryptodira, Sea Turtles. Herpetological Notes, 47(3), 501–512.

Murray, R., Dronen, N., & Blend, C. (2004). Endohelminths from five rare species of turtles (Bataguridae) from southeast Asia confiscated by international authorities in Hong Kong, People's Republic of China. Zootaxa, 786(1), 1. <https://doi.org/10.11646/zootaxa.786.1.1>

Namroodi, S., Staji, H., Hashemi, S., & Ghaemi, E. (2016). Dissemination of Zoonotic Antibiotic Resistant Serotypes of *Salmonella* by Caspian Pond Turtles, Golestan and Mazandaran Provinces, Iran. International Journal of Enteric Pathogens, 5(1), 30–33.  
<https://doi.org/10.15171/ijep.2017.07>

Nardoni, S., & Mancianti, F. (2023). Mycotic Diseases in Chelonians. Journal of Fungi, 9(5), 518.  
<https://doi.org/10.3390/jof9050518>

Nardoni, S., Papini, R., Marcucci, G., & Mancianti, F. (2008). Survey on the fungal flora of the cloaca of healthy pet reptiles. Revue Méd. Vét.

Neely, W., Freeman, J., Greiner, E., & Dronen, N. (2017). A Sample of Endohelminths from Four Species of Malaysian Freshwater Turtles (Geoemydidae) Confiscated in 2001 by Authorities in Hong Kong, People's Republic of China. Comparative Parasitology, 84(2), 201– 205.  
<https://doi.org/10.1654/1525-2647-84.2.201>

Nel, T., Du Preez, L., Netherlands, E., Syrota, Y., & Svitin, R. (2021). *Spiroxys ankarafantsika* Roca et Garcia, 2008 (Nematoda: Gnathostomatidae) and Other Nematodes Parasitising *Pelusios* spp. (Testudines: Pelomedusidae) from South Africa and Mozambique. Acta Parasitologica, 66(3), 954–961. <https://doi.org/10.1007/s11686-021-00352-0>

Novelli, I., Morton, G., Trindade, I., Neto-Silva, D., & Vieira, F. (2014). First occurrence of *Spirocamallanus* sp. (Nematoda, Camallanoidea) in a freshwater turtle, *Hydromedusa tectifera* (Cope, 1869) (Testudines, Chelidae), from Brazil. Herpetology Notes, 7, 599–602.

Nowakiewicz, A., Ziółkowska, G., Zięba, P., Dziedzic, B., Gnat, S., Wójcik, M., Dziedzic, R., & Kostruba, A. (2015). Aerobic Bacterial Microbiota Isolated from the Cloaca of the European Pond Turtle (*Emys orbicularis*) in Poland. Journal of Wildlife Diseases, 51(1), 255–259.  
<https://doi.org/10.7589/2013-07-157>

- Oceguera-Figueroa, A., & Siddall, M. (2008). *Placobdella lamothei* n. sp. (Hirudinea: Glossiphoniidae), a new leech parasite of freshwater turtles from Estado de México, Mexico. *Revista Mexicana de Biodiversidad*, 79(002). <https://doi.org/10.22201/ib.20078706e.2008.001.511>
- Oi, M., Araki, J., Matsumoto, J., & Nogami, S. (2012). Helminth fauna of a turtle species introduced in Japan, the red-eared slider turtle (*Trachemys scripta elegans*). *Research in Veterinary Science*, 93(2), 826–830.
- Okoh, G. R., Ariel, E., Wirth, W., Whitmore, D., & Horwood, P. (2023). Molecular detection of novel herpesviruses and adenoviruses in two species of Australian freshwater turtles. *European Journal of Wildlife Research*, 69(4), 84. <https://doi.org/10.1007/s10344-023-01714-x>
- Oliveira, J. P., Kawanami, A. E., Silva, A. S. L., Chung, D. G., & Werther, K. (2016). Detection of *Leptospira* spp. In wild *Phrynops geoffroanus* (Geoffroy's side-necked turtle) in urban environment. *Acta Tropica*, 164, 165–168. <https://doi.org/10.1016/j.actatropica.2016.08.019>
- Oliveira, J., André, M., Júnior, J., Lustosa, A., & Werther, K. (2018). Molecular detection of hemogregarines and haemosporidians in Brazilian free-living testudines. *International Journal for Parasitology: Parasites and Wildlife*, 7(1), 75–84. <https://doi.org/10.1016/j.ijppaw.2018.01.008>
- Origgi, F., & Jacobson, E. (2000). DISEASE OF THE RESPIRATORY TRSCT OF CHELONIANS. *Veterinary Clinics of North America: Exotic Animal Practice*, 3(2), 537–549.
- Ossiboff, R., Newton, A., Seimon, T., Moore, R., & McAloose, D. (2015a). Emydid herpesvirus 1 infection in northern map turtles (*Graptemys geographica*) and painted turtles (*Chrysemys picta*). *Journal of Veterinary Diagnostic Investigation*, 27(3), 392–395. <https://doi.org/10.1177/1040638715584793>
- Ossiboff, R., Raphael, B., Ammazalorso, A., Seimon, T., Newton, A., Chang, T., Zarate, B., Whitlock, A., & McAloose, D. (2015b). Three Novel Herpesviruses of Endangered *Clemmys* and *Glyptemys* Turtles. *PLOS ONE*, 10(4), e0122901. <https://doi.org/10.1371/journal.pone.0122901>

- Otis, V., & Behler, J. (1973). THE OCCURRENCE OF *Salmonellae* AND *Edwardsiella* IN THE TURTLES OF THE NEW YORK ZOOLOGICAL PARK. *Journal of Wildlife Diseases*, 9(1), 4–6. <https://doi.org/10.7589/0090-3558-9.1.4>
- Owens, A., Smith, J., Cole, R., Lorch, J., & Grear, D. (2023). *Epistylis* spp. Infestation in Two Species of Mud Turtles (*Kinosternon* spp.) in the American Southwest. *Journal of Wildlife Diseases*, 59(1), 167–171.
- Özcan, M., & Sarieyyüpoğlu, M. (2009). Elazığ Şehir Kanalizasyonunun Keban Baraj Gölüne Döküldüğü Bölgeden Yakalanan Tatlı Su Kaplumbağası (*Mauremys caspica caspica*, Gmelin, 1774)'nda *Salmonella*'ların Araştırılması. *Kafkas Üniversitesi Veteriner Fakültesi Dergisi*. <https://doi.org/10.9775/kvfd.2009.104-A>
- Özvegy, J., Marinković, D., Vučićević, M., Gajić, B., Stevanović, J., Krnjaić, D., & AleksićKovačević, S. (2015). Cytological And Molecular Identification Of *Haemogregarina stepanowi* In Blood Samples Of The European Pond Turtle (*Emys orbicularis*) From Quarantine At Belgrade Zoo. *Acta Veterinaria*, 65(4), 443–453. <https://doi.org/10.1515/acve-2015-0037>
- Palumbo, E., & Diaz, J. I. (2018). New species and new record of the genus *Cheloniodiplostomum* (Trematoda, Proterodiplostomidae, Polycotylineae), parasites of freshwater turtles from Argentina. *Parasitology Research*, 117(3), 767–773. <https://doi.org/10.1007/s00436-018-5750-9>
- Palumbo, E., Capasso, S., Cassano, M., Alcalde, L., & Diaz, J. (2016). *Spiroxys contortus* (Rudolphi, 1819) and *Hedruris orestiae* (Moniez, 1889) in Argentine turtles. *Check List*, 12(6), 1993. <https://doi.org/10.15560/12.6.1993>
- Palumbo, E., Servián, A., Sánchez, R., & Diaz, J. (2020). A new species of *Hedruris* (Nematoda: Hedruridae) from freshwater turtles, its life cycle and biogeographic distribution of the genus. *Journal of Helminthology*, 94, e93. <https://doi.org/10.1017/S0022149X19000877>
- Palumbo, E., Werneck, M., & Diaz, J. (2019). Is *Amphiorchis* (Digenea: Spirorchidae) an exclusive parasite of sea turtles? *Helminthologia*, 56(1), 75–80. <https://doi.org/10.2478/helm-2018-0045>
- Paré, J. (2008). An Overview of Pentastomiasis in Reptiles and Other Vertebrates. *Journal of Exotic Pet Medicine*, 17(4), 285–294. <https://doi.org/10.1053/j.jepm.2008.07.005>

- Parks, M., Kedy, C., & Skalla, C. (2020). Consistent patterns in 16S and 18S microbial diversity from the shells of the common and widespread red-eared slider turtle (*Trachemys scripta*). PLOS ONE, 15(12), e0244489. <https://doi.org/10.1371/journal.pone.0244489>
- Parren, S. G. (2013). A TWENTY-FIVE YEAR STUDY OF THE WOOD TURTLE (*Glyptemys insculpta*) IN VERMONT: MOVEMENTS, BEHAVIOR, INJURIES, AND DEATH. Herpetological Conservation and Biology, 8(1), 176–190.
- Parrish, K., Kirkland, P., Skerratt, L. , & Ariel, E. (2021). Nidoviruses in Reptiles: A Review. Frontiers in Veterinary Science, 8, 733404. <https://doi.org/10.3389/fvets.2021.733404>
- Pasmans, F., De Herdt, P., & Haesebrouck, F. (2002). Presence of *Salmonella* infections in freshwater turtles. Veterinary Record, 150(22), 692–693. <https://doi.org/10.1136/vr.150.22.692>
- Pereira, A., Brito, S., Filho, J., Teixeira, A., Teles, D., Santana, D., Lima, V., & Almeida, W. (2018). Diet and helminth parasites of freshwater turtles *Mesoclemmys tuberculata*, *Phrynops geoffroanus* (Pleurodira: Chelidae) and *Kinosternon scorpioides* (Cryptodira: Kinosternidae) in a semiarid region, Northeast of Brazil. Acta Herpetologica, 21-32 Pages. [https://doi.org/10.13128/ACTA\\_HERPETOL-20323](https://doi.org/10.13128/ACTA_HERPETOL-20323)
- Perera, A., Hernandez-Sastre, P., & Ayres, C. (2019). Hitch me a ride: First report of the alien leech *Helobdella octatestisaca* in Europe associated with freshwater turtles. Biological Invasions, 21(12), 3467–3471. <https://doi.org/10.1007/s10530-019-02076-9>
- Phadee, P., Kurata, O., Hatai, K., Hirono, I., & Aoki, T. (2004). Detection and Identification of Fish-Pathogenic *Aphanomyces piscicida* Using Polymerase Chain Reaction (PCR) with Species-Specific Primers. Journal of Aquatic Animal Health, 16(4), 220–230. <https://doi.org/10.1577/H03-047.1>
- Picelli, A., Carvalho, A., Viana, L., & Malvasio, A. (2015). Prevalence and parasitemia of *Haemogregarina* sp. in *Podocnemis expansa* (Testudines: Podocnemididae) from the Brazilian Amazon. Revista Brasileira de Parasitologia Veterinária, 24(2), 191–197. <https://doi.org/10.1590/S1984-29612015033>
- Pichelin, S. (1995). The taxonomy and biology of the Polystomatidae (Monogenea) in Australian freshwater turtles (Chelidae, Pleurodira). Journal of Natural History, 29(6), 1345– 1381. <https://doi.org/10.1080/00222939500770571>



- Pichelin, S., Cribb, T., & Bona, F. (1998). *Glossocercus chelodinae* (MacCallum, 1921) n. comb. (Cestoda: Dilepididae) from freshwater turtles in Australia and a redefinition of the genus *Bancroftiella* Johnston, 1911. *Systematic Parasitology*, 39(3), 165–181. <https://doi.org/10.1023/A:1005922311904>
- Pineda-Catalan, O., Perkins, S., Peirce, M., Engstrand, R., Garcia-Davila, C., Pinedo-Vasquez, M., & Aguirre, A. (2013). Revision of *Hemoproteid* Genera and Description and Redescription of Two Species of Chelonian Hemoproteid Parasites. *Journal of Parasitology*, 99(6), 1089–1098. <https://doi.org/10.1645/13-296.1>
- Platt, T. (2000a). *Neopolystoma fentoni* n. sp. (Monogenea: Polystomatidae) a parasite of the conjunctival sac of freshwater turtles in Costa Rica. *Memórias do Instituto Oswaldo Cruz*, 95(6), 833–837. <https://doi.org/10.1590/S0074-02762000000600014>
- Platt, T. (2000b). HELMINTH PARASITES OF THE WESTERN PAINTED TURTLE, *Chrysemys picta belli* (GRAY), INCLUDING *Neopolystoma elizabethae* N. SP. (MONOGENEA: POLYSTOMATIDAE), A PARASITE OF THE CONJUNCTIVAL SAC. *The Journal of Parasitology*, 86(4), 815–818.
- Platt, T. (2003). DESCRIPTION OF *Auriculotrema lechneri* N. GEN., N. SP. (DIGENEA: CHOANOCOTYLIDAE), A PARASITE OF FRESHWATER TURTLES (TESTUDINES: PLEURODIRA: CHELIDAE) FROM QUEENSLAND, AUSTRALIA. *Journal of Parasitology*, 89(1), 141–144. [https://doi.org/10.1645/0022-3395\(2003\)089\[0141:DOALNG\]2.0.CO;2](https://doi.org/10.1645/0022-3395(2003)089[0141:DOALNG]2.0.CO;2)
- Platt, T. R. (1991). Notes on the Genus *Hapalorhynchus* (Digenea: Spirorchidae) from African Turtles. *Transactions of the American Microscopical Society*, 110(2), 182. <https://doi.org/10.2307/3226756>
- Platt, T., & Jensen, R. J. (2002). *Aptorchis aequalis* Nicoll, 1914 (Digenea: Plagiurchiidae) is a senior synonym of *Dingularis anfractocirrus* Jue Sue & Platt, 1999 (Digenea: Plagiurchiidae). *Systematic Parasitology*, 52(3), 183–191. <https://doi.org/10.1023/A:1015733618417>
- Platt, T., & Blair, D. (1996). Two New Species of *Uterotrema* (Digenea: Spirorchidae) Parasitic in *Emydura krefftii* (Testudines: Chelidae) from Australia. *The Journal of Parasitology*, 82(2), 307. <https://doi.org/10.2307/3284166>
- Platt, T., & Brooks, D. (2001). description of *Buckarootrema goodmani* n. g., n. sp. (Digenea: Pronocephalidae), a parasite of the freshwater turtle *Emydura macquarii* (Gray, 1830) (Pleurodira: Chelidae) from Queensland, Australia, and a phylogenetic analysis of the genera of the Pronocephalidae Looss, 1902. *Journal of Parasitology*, 87(5), 1115–1119.

- Platt, T., & Pichelin, S. (1994). *Uterotrema australispinosa* n. gen., n. sp. (Digenea: Spirorchidae), a Parasite of a Freshwater Turtle *Emydura macquarii* from Southern Queensland, Australia. The Journal of Parasitology, 80(6), 1008. <https://doi.org/10.2307/3283450>
- Platt, T., & Sharma, R. (2012). Two New Species of *Hapalorhynchus* (Digenea: Spirorchidae) from Freshwater Turtles (Testudines: Geoemydidae) in Malaysia. Comparative Parasitology, 79(2), 202–207. <https://doi.org/10.1654/4551.1>
- Platt, T., & Tkach, V. (2003). Two new species of *Choanocotyle* Jue Sue And Platt, 1998 (Digenea: Choanocotylidae) from an australian freshwater turtle (Testudines: Pleurodira: Chelidae). Journal of Parasitology, 89(1), 145–150. [https://doi.org/10.1645/0022-3395\(2003\)089\[0145:TNSOCJ\]2.0.CO;2](https://doi.org/10.1645/0022-3395(2003)089[0145:TNSOCJ]2.0.CO;2)
- Porter, A., Pettersson, J., Chang, W.-S., Harvey, E., Rose, K., Shi, M., Eden, J.-S., Buchmann, J., Moritz, C., & Holmes, E. (2020). Metagenomic identification of diverse animal hepaciviruses and pegiviruses. BioRxiv. <https://doi.org/10.1101/2020.05.16.100149>
- Premaalatha, B., Jamnah, O., Tang, W., & Chandrawathani, P. (2018). Helminths in local river terrapins (*Batagur affinis*) in the Wildlife Conservation Centre, Perak. Malaysian Journal of Veterinary Research, 9(2), 171–174.
- Radulski, Ł., Krajewska-Wędzina, M., Lipiec, M., Weiner, M., Zabost, A., & Augustynowicz-Kopeć, E. (2023). Mycobacterial Infections in Invasive Turtle Species in Poland. Pathogens, 12(4), 570. <https://doi.org/10.3390/pathogens12040570>
- Rajabloo, M., Sharifiyazdi, H., Namazi, F., Shayegh, H., Rakhshandehroo, E., & Farjanikish, G. (2017). Morphological and molecular analyses of the spiruroid nematode, *Falcaustra araxiana* Massino, 1924 (= *Spirooura araxiana*) from the European pond turtle (*Emys orbicularis*). Journal of Helminthology, 91(3), 356–359. <https://doi.org/10.1017/S0022149X16000195>
- Rakhshandehroo, E., Gholamhosseini, A., Ahmadi, A., Rakhshaninejad, M., & Heidari, A. (2020). An investigation on the helminth parasites of Caspian turtle (*Mauremys caspica*) with a taxonomic note on recovered *Falcaustra* Lane, 1915 (Nematoda: Kathlaniidae) and *Spiroxys* Schneider, 1866 species (Nematoda: Gnathostomatidae). International Journal of Aquatic Biology, 8(4), 246–252.
- Rakhshandehroo, E., Sharifiyazdi, H., & Ahmadi, A. (2016). Morphological and molecular characterisation of *Haemogregarina* sp. (Apicomplexa: Adeleina: Haemogregarinidae) from

- the blood of the Caspian freshwater turtle *Mauremys caspica* (Gmelin) (Geoemydidae) in Iran. *Systematic Parasitology*, 93(5), 517–524. <https://doi.org/10.1007/s11230-016-9643-y>
- Ramaglia, V., Harapa, G., White, N., & Buck, L. (2004). Bacterial infection and tissue-specific Hsp72, -73 and -90 expression in western painted turtles. *Comparative Biochemistry and Physiology Part C: Toxicology & Pharmacology*, 138(2), 139–148. <https://doi.org/10.1016/j.cca.2004.06.007>
- Rangel-Mendoza, J., Sánchez-González, I., López-Luna, M., & Weber, M. (2014). Health and Aquatic Environment Assessment of Captive Central American River Turtles, *Dermatemys mawii*, at Two Farms in Tabasco, Mexico. *Chelonian Conservation and Biology*, 13(1), 96–109. <https://doi.org/10.2744/CCB-1040.1>
- Rataj, A., Lindtner-Knific, R., Vlahović, K., Mavri, U., & Dovč, A. (2011). Parasites in pet reptiles. *Acta Veterinaria Scandinavica*, 53(1), 33. <https://doi.org/10.1186/1751-0147-53-33>
- Readel, A. M., Phillips, C. A., & Wetzel, M. J. (2008). Leech Parasitism in a Turtle Assemblage: Effects of Host and Environmental Characteristics. *Copeia*, 2008(1), 227–233. <https://doi.org/10.1643/CH-06-212>
- Readel, A., Phillips, C., & Goldberg, T. (2010). Prevalence of *Salmonella* in intestinal mucosal samples from free-ranging red-eared sliders (*Trachemys scripta elegans*) in Illinois. *Herpetological Conservation and Biology*.
- Reavill, D., & Stevenson, R. (2004). Review of spirorchid flukes (Digenea: Spirorchidae) and three cases in freshwater turtles.
- Reilly, J., Asthon, D., Holley, J., McClarnon, M., Moser, W., & Phillips, A. (2023). Rogue turtles with exotic leeches: The Northwestern Pond Turtle (*Actinemys marmorata*) as a host for the Common North American Turtle Leech (*Placobdella parasitica*). *Herpetological Conservation and Biology*, 18(3), 529–539.
- Reyes-Prieto, M., Ocegüera-Figueroa, A., Snell, S., Negredo, A., Barba, E., Fernández, L., Moya, A., & Latorre, A. (2014). DNA barcodes reveal the presence of the introduced freshwater leech *Helobdella europaea* in Spain. *Mitochondrial DNA*, 25(5), 387–393. <https://doi.org/10.3109/19401736.2013.809426>
- Richardson, D. J., Moser, W. E., Hammond, C. I., Shevchenko, A. C., & Lazo-Wasem, E. (2010). New Geographic Distribution Records and Host Specificity of *Placobdella ali* (Hirudinida:

Glossiphoniidae). Comparative Parasitology, 77(2), 202–206.  
<https://doi.org/10.1654/4456.1>

- Rigby, M., Sharma, R., Hechinger, R., Platt, T., & Weaver, J. (2008). Two New Species of *Camallanus* (Nematoda: Camallanidae) From Freshwater Turtles in Queensland, Australia. *Journal of Parasitology*, 94(6), 1364–1370. <https://doi.org/10.1645/GE-1504.1>
- Rissmann, M., Lenk, M., Stoek, F., Szentiks, C., Eiden, M., & Groschup, M. (2021). Replication of Rift Valley Fever Virus in Amphibian and Reptile-Derived Cell Lines. *Pathogens*, 10(6), 681. <https://doi.org/10.3390/pathogens10060681>
- Roberts, J., & Bullard, S. (2017b). Revision and New Species of *Vasotrema* Stunkard, 1926 (Digenea: Schistosomatoidea): Turtle Blood Flukes of North American Softshell Turtles (Testudines: Trionychidae: *Apalone* spp.). *Journal of Parasitology*, 103(5), 519–540. <https://doi.org/10.1645/16-190>
- Roberts, J., Arias, C., Halanych, K., Dang, B., & Bullard, S. (2018b). A new genus and species of turtle blood fluke (Digenea: Schistosomatoidea) from the Mekong snail-eating turtle, *Malayemys subtrijuga* (Schlegel & Müller) (Testudines: Geoemydidae) in Vietnam, with a reassessment of related Asiatic turtle blood flukes and molecular phylogeny. *Systematic Parasitology*, 95(2–3), 133–145. <https://doi.org/10.1007/s11230-017-9772-y>
- Roberts, J., Halanych, K., Arias, C., Folt, B., Goessling, J., & Bullard, S. (2017a). Emendation and new species of *Hapalorhynchus* Stunkard, 1922 (Digenea: Schistosomatoidea) from musk turtles (Kinosternidae: Sternotherus) in Alabama and Florida rivers. *Parasitology International*, 66(6), 748–760. <https://doi.org/10.1016/j.parint.2017.09.001>
- Roberts, J., Halanych, K., Arias, C., Curran, S., & Bullard, S. (2018a). A New Species of *Spirorchis* MacCallum, 1918, (Digenea: Schistosomatoidea) and *Spirorchis scripta* Stunkard, 1923, Infecting River Cooter, *Pseudemys concinna* (Le Conte, 1830), (Testudines: Emydidae) in the Pascagoula River, Mississippi, U.S.A., Including an Updated Phylogeny for *Spirorchis* spp. *Comparative Parasitology*, 85(2), 120–132. <https://doi.org/10.1654/1525-2647-85.2.120>
- Roberts, J., Orelis-Ribeiro, R., Dang, B., Halanych, K., & Bullard, S. (2016b). Blood flukes of Asiatic softshell turtles: Revision of *Coeuritrema* Mehra, 1933 (Digenea: Schistosomatoidea) and a new species infecting Chinese softshell turtles, *Pelodiscus sinensis* (Trionychidae), from Vietnam. *Folia Parasitologica*, 63. <https://doi.org/10.14411/fp.2016.031>

- Roberts, J., Platt, T., Orelis-Ribeiro, R., & Bullard, S. (2016a). New Genus of Blood Fluke (Digenea: Schistosomatoidea) from Malaysian Freshwater Turtles (Geoemydidae) and its Phylogenetic Position Within Schistosomatoidea. *The Journal of Parasitology*, 102(4), 451–462. <https://doi.org/10.1645/15-893>
- Roberts, J., Warren, M., Halanych, K., & Bullard, S. (2019). *Spirorchis* spp. (Digenea: Schistosomatoidea) infecting map turtles (Cryptodira: Emydidae: *Graptemys* spp.) in southeastern North America: A new species, molecular phylogenies, and key to species. *Systematic Parasitology*, 96(1), 51–64. <https://doi.org/10.1007/s11230-018-9831-z>
- Roberts, J., Whipps, C., Bartholomew, J., Schneider, L., & Jacobson, E. (2008). *Myxidium scripta* n. sp. Identified in urinary and biliary tract of Louisiana-farmed red-eared slider turtles *Trachemys scripta elegans*. *Diseases of Aquatic Organisms*, 80, 199–209. <https://doi.org/10.3354/dao01912>
- Roberts, K., & Hughes, W. (2015). Horizontal transmission of a parasite is influenced by infected host phenotype and density. *Parasitology*, 142(2), 395–405. <https://doi.org/10.1017/S0031182014001243>
- Roca, V., & García, G. (2008). A new species of the genus *Spiroxys* (Nematoda: Gnathostomatidae) from Madagascan pleurodiran turtles (Pelomedusidae). *Journal of Helminthology*, 82(4), 301–303. <https://doi.org/10.1017/S0022149X08996966>
- Rohde, K. (1984). Two amphistomes, *Lobatodiscus australiensis* n.g., n.sp. and *Elseyatrema microacetabularis* n.g., n.sp., from the Australian turtle *Elseya dentata* (Gray). *Systematic Parasitology*, 6(3), 219–227. <https://doi.org/10.1007/BF00009231>
- Romero, D., Duarte, J., Narváez-Ledesma, L., Farfán, M., & Real, R. (2014). Presence of the leech *Placobdella costata* in the south of the Iberian Peninsula. *Acta Parasitologica*, 59(2). <https://doi.org/10.2478/s11686-014-0232-4>
- Rosen, R., & Marquardt, W. C. (1978). Helminth Parasites of the Red-Eared Turtle (*Pseudemys scripta elegans*) in Central Arkansas. *The Journal of Parasitology*, 64(6), 1148. <https://doi.org/10.2307/3279759>
- Rossow, J., Hernandez, S., Summer, S., Altman, B., Crider, C., Gammage, M., Sagel, K., & Yabsley, M. (2013). *Haemogregarine* infections of three species of aquatic freshwater turtles from two sites in Costa Rica. *International Journal for Parasitology: Parasites and Wildlife*, 2, 131–135. <https://doi.org/10.1016/j.ijppaw.2013.02.003>

- Rostami, A., Shahabi, M., & Madani, A. (2017). A molecular survey of Chlamydial infection in pet and zoo captive reptiles. *Iranian Journal of Veterinary Medicine*, 11(3), 227–233.
- Rudzińska, M., Kowalewska, B., Waleron, M., Kalicki, M., Sikorska, K., & Szostakowska, B. (2021). Molecular characterization of *Blastocystis* from animals and their Ccregivers at the Gdańsk Zoo (Poland) and the assessment of zoonotic transmission. *Biology*, 10(10), 984. <https://doi.org/10.3390/biology10100984>
- Ruzauskas, M., Misyte, S., Vaskeviciute, L., Mikniene, Z., Siugzdiniene, R., Klimiene, I., Pikuniene, A., & Kucinskiene, J. (2016). Gut microbiota isolated from the European pond turtle (*Emys orbicularis*) and its antimicrobial resistance. *Polish Journal of Veterinary Sciences*, 19(4), 723–730. <https://doi.org/10.1515/pjvs-2016-0091>
- Ryan, T., & Lambert, A. (2005). Prevalence and Colonization of *Placobdella* on Two Species of Freshwater Turtles (*Graptemys geographica* and *Sternotherus odoratus*). *Journal of Herpetology*, 39(2), 284–287. <https://doi.org/10.1670/180-04N>
- Rzeżutka, A., Kaupke, A., & Gorzkowski, B. (2020). Detection of *Cryptosporidium parvum* in a Red-Eared Slider Turtle (*Trachemys scripta elegans*), a Noted Invasive Alien Species, Captured in a Rural Aquatic Ecosystem in Eastern Poland. *Acta Parasitologica*, 65(3), 768– 773. <https://doi.org/10.2478/s11686-020-00180-8>
- Salleh, M., & Esa, Y. (2023). The First Next-Generation Sequencing Metabarcoding Dataset on Faecal Bacterial Diversity from the Southern River Terrapin, *Batagur affinis* ssp. *Malaysian Journal of Fundamental and Applied Sciences*, 19(1), 1–5. <https://doi.org/10.11113/mjfas.v19n1.2802>
- Salleh, M., Esa, Y., Ngalimat, M., & Chen, P. (2022). Faecal DNA metabarcoding reveals novel bacterial community patterns of critically endangered Southern River Terrapin, *Batagur affinis*. *PeerJ*, 10, e12970. <https://doi.org/10.7717/peerj.12970>
- Salzmann, E., Müller, E., & Marschang, R. (2021). Detection of testadenoviruses and atadenoviruses in tortoises and turtles in Europe. *Journal of Zoo and Wildlife Medicine*, 52(1), 223–231. <https://doi.org/10.1638/2020-0078>
- Santana, D., Iwama, R., Teixeira, A., Moura, G., Faria, R., & Mesquita, D. (2019). Spatiotemporal variation and the use of host body surface by ectoparasites of the chelonians *Phrynops geoffroanus* and *Mesoclemmys tuberculata* in areas of the Caatinga and Atlantic Forest in

northeast Brazil. *Parasitology Research*, 118(3), 913–926. <https://doi.org/10.1007/s00436-019-06208-x>

Santana, D., Pereira, J., Romão, B., Ferreira, E., & Lima, S. (2020). *Haementeria* sp. (Clitellata: Hirudinea) parasitising *Phrynops geoffroanus* (Testudines: Chelidae) in limnetic ecosystems of northeastern Brazil. *Herpetology Notes*, 13, 1103–1106.

Santana, D., Teixeira, A., Araujo-Filho, J., Teles, D., Pereira, A., Brito, S., Almeida, W., & Mesquita, D. (2023). Helminths of freshwater turtles in Northeastern Brazil: Parasite– host– environment relationships. *Journal of Natural History*, 57(9–12), 503–519. <https://doi.org/10.1080/00222933.2023.2203334>

Saratchandra, B. (1980). *Trypanosoma lissemysi* n.sp. From the freshwater turtle, *Lissemys punctata granosa*. *Proceedings of the Indian Academy of Parasitology*, 1(2), 9–12.

Scardino, R., Arculeo, M., Arizza, V., Bazan, G., Valvo, M., Marrone, F., & Vecchioni, L. (2021). New distributional data on *Haemogregarina stepanowi* (Apicomplexa) and *Placobdella costata* (Hirudinea) parasitising the Sicilian pond turtle *Emys trinacris* (Testudines). *Natural History Sciences*, 9(1), 11–16. <https://doi.org/10.4081/nhs.2022.544>

Scheelings, T., & Rafferty, A. (2012). Hematologic and serum biochemical values of gravid freshwater australian chelonians. *Journal of Wildlife Diseases*, 48(2), 314–321. <https://doi.org/10.7589/0090-3558-48.2.314>

Schönbächler, K., Olias, P., Richard, O., Origgi, F., Dervas, E., Hoby, S., Basso, W., & Berenguer Veiga, I. (2022). Fatal spirorchiidosis in European pond turtles (*Emys orbicularis*) in Switzerland. *International Journal for Parasitology: Parasites and Wildlife*, 17, 144–151. <https://doi.org/10.1016/j.ijppaw.2022.01.004>

Schönbächler, K., Segner, H., Amphimaque, B., Friker, B., Hofer, A., Lange, B., Stirn, M., Pantchev, N., Origgi, F., & Hoby, S. (2022). Health assessment of captive and free-living european pond turtles (*Emys orbicularis*) in Switzerland. *Journal of Zoo and Wildlife Medicine*, 53(1), 159–172. <https://doi.org/10.1638/2020-0117>

Segade, P., Crespo, C., Ayres, C., Cordero, A., Arias, M., García-Estévez, J., & Blanco, R. (2006). *Eimeria* species from the european pond turtle, *Emys orbicularis* (Reptilia: Testudines), in Galicia (NW Spain), with description of two new species. *Journal of Parasitology*, 92(1), 69–72. <https://doi.org/10.1645/GE-3491.1>



- Seigel, R. (1983). Occurrence and Effects of Barnacle Infestations on Diamondback Terrapins (*Malaclemys terrapin*). American Midland Naturalist, 109(1), 34. <https://doi.org/10.2307/2425512>
- Simon, T. A., Horne, B. D., Tomaszewicz, A., Pruvot, M., Som, S., In, S., Sokha, C., Platt, S., Toledo, P., McAloose, D., & Calle, P. P. (2017). Disease screening in southern river terrapins (*Batagur affinis edwardmollii*) in Cambodia. Journal of Zoo and Wildlife Medicine, 48(4), 1242–1246. <https://doi.org/10.1638/1042-7260-48.4.1242>
- Selvarajah, G., & Khairani-Bejo, S. (2019). Identification of *Salmonella* and other pathogenic bacteria in pet red-eared sliders, *Trachemys scripta elegans*, from pet shops in the Klang Valley. Journal Veterinar Malaysia, 31(2), 23–27.
- Shamsi, S., Nuhoglu, A., Zhu, X., & Barton, D. (2021). Genetic characterisation of cercarial stages of *Choanocotyle* Jue Sue and Platt, 1998 (Digenea: Choanocotylidae) in a native Australian freshwater snail, *Isidorella hainesii* (Tryon). International Journal for Parasitology: Parasites and Wildlife, 16, 48–51. <https://doi.org/10.1016/j.ijppaw.2021.08.001>
- Sharma, R., Rigby, M., Sumita, S., Sani, R., Vidyadaran, M., Jasni, S., & Dailey, M. (2002). Redescription of *Serpinema octorugatum* (Baylis, 1933) (Nematoda: Camallanidae) from the Malayan box turtle *Cuora amboinensis* (Daudin) (Chelonia: Bataguridae). Systematic Parasitology, 53(1), 19–28. <https://doi.org/10.1023/A:1019997922052>
- Shayegh, H., Rajabloo, M., Gholamhosseini, A., Alavi, A., Salarian, P., & Zolfaghari, A. (2016). Endohelminths of European pond turtle *Emys orbicularis* in Southwest Iran. Journal of Parasitic Diseases, 40(1), 194–198. <https://doi.org/10.1007/s12639-014-0477-8>
- Shen, L., Shi, H., Wang, R., Liu, D., & Pang, X. (2011). an invasive species red-eared slider (*Trachemys scripta elegans*) carrying *Salmonella* pathogens in Hainan Island. Molecular Pathogens, 2. <https://doi.org/10.5376/mp.2011.02.0004>
- Shubber, H., Alwaaly, A., & Mohammad, M. (2020). Intestinal helminth parasites of caspian turtle *Mauremys caspica* (Gmelin, 1774) (Testudines, Geoemydidae) from Al-Diwaniya province, Iraq. Annals of Tropical Medicine and Public Health, 23(12). <https://doi.org/10.36295/ASRO.2020.231237>
- Siddall, M., & Dessler, S. S. (2001). Transmission of *Haemogregarina balli* From Painted Turtles to Snapping Turtles Through the Leech *Placobdella ornata*. Journal of Parasitology, 87(5), 1217–1218.



- Silbernagel, C., Clifford, D., Bettaso, J., Worth, S., & Foley, J. (2013). Prevalence of selected pathogens in western pond turtles and sympatric introduced red-eared sliders in California, USA. *Diseases of Aquatic Organisms*, 107(1), 37–47. <https://doi.org/10.3354/dao02663>
- Silva, B., Wimalasena, S., Hossain, S., Pathirana, H., & Heo, G.-J. (2017). Characterization of quinolone resistance of *Pseudomonas aeruginosa* isolated from pet chinese stripe-necked turtles (*Ocadia sinensis*). *Asian Journal of Animal and Veterinary Advances*, 12(3), 152–160. <https://doi.org/10.3923/ajava.2017.152.160>
- Silva, L. M. O., Jesus, R. F., Santos, A. N., Nandyara, B., Willkens, Y., Santos, J. N., & Melo, F. T. V. (2023). New species of *Serpinema* (Nematoda: Camallanidae) from the scorpion mud turtle *Kinosternon scorpioides* (Testudines: Kinosternidae) from eastern Amazon, Brazil. *International Journal for Parasitology: Parasites and Wildlife*, 22, 6–13. <https://doi.org/10.1016/j.ijppaw.2023.07.006>
- Sim, R. R., Norton, T. M., Bronson, E., Allender, M. C., Stedman, N., Childress, A. L., & Wellehan, J. F. X. (2015). Identification of a novel herpesvirus in captive Eastern box turtles (*Terrapene carolina carolina*). *Veterinary Microbiology*, 175(2–4), 218–223. <https://doi.org/10.1016/j.vetmic.2014.11.029>
- Sim, R., Ossiboff, R., Nelson, J., & Oddo, T. (2021). Emydid herpesvirus 1 infections in western pond turtles (*Actinemys marmorata*) and a red-eared slider (*Trachemys scripta elegans*) with fatal and nonfatal outcomes. *Journal of Zoo and Wildlife Medicine*, 52(4), 1275–1279.
- Simmons, L.-A., & Burrridge, M. (2000). Introduction of the exotic ticks *Amblyomma humerale* Koch and *Amblyomma geoemydae* (Cantor) (Acari: Ixodidae) into the United States on imported reptiles. *International Journal of Acarology*, 26(3), 239–242. <https://doi.org/10.1080/01647950008684194>
- Šíroký, P., & Modrý, D. (2005). Two new species of Eimeria (Apicomplexa: Eimeriidae) from Asian geoemydid turtles *Kachuga tentoria* and *Melanochelys trijuga* (Testudines: Geoemydidae). *Parasite*, 12(1), 9–13. <https://doi.org/10.1051/parasite/2005121009>
- Šíroký, P., & Modrý, D. (2010). Eimeriid coccidia (Apicomplexa: Eimeriidae) from geoemydid turtles (Testudines: Geoemydidae) with a description of six new species. *Acta Protozoologica*, 49, 301–310.
- Šíroký, P., Frye, F., Dvořáková, N., Hostovský, M., Prokop, H., & Kulich, P. (2018). Herpesvirus associated dermal papillomatosis in Williams' mud turtle *Pelusios williamsi* with effects of

- autogenous vaccine therapy. *Journal of Veterinary Medical Science*, 80(8), 1248– 1254.  
<https://doi.org/10.1292/jvms.18-0126>
- Široký, P., Kamler, M., & Modrý, D. (2006a). A new *Eimeria* (Apicomplexa: Eimeriidae), possessing mitra-shaped oocysts, from the Neotropical chelid turtle *Batrachemys heliostemma* (Testudines: Chelidae), and its comparison with *Eimeria mitraria* (Laveran & Mesnil 1902). *Memórias Do Instituto Oswaldo Cruz*, 101(5), 555–558. <https://doi.org/10.1590/S0074-02762006000500013>
- Široký, P., Kamler, M., & Modrý, D. (2006b). *Eimeria lokuma* n. sp. (Apicomplexa: Eimeriidae), a new coccidium from the African helmeted turtle *Pelomedusa subrufa* (Lacépède) (Testudines: Pelomedusidae). *Systematic Parasitology*, 65(1), 73–76.  
<https://doi.org/10.1007/s11230-006-9040-z>
- Smith, J. N., Dyszel, J. L., Soares, J. A., Ellermeier, C. D., Altier, C., Lawhon, S. D., Adams, L. G., Konjufca, V., Curtiss, R., Slauch, J. M., & Ahmer, B. M. M. (2008). SdiA, an NAcylhomoserine Lactone Receptor, Becomes Active during the Transit of *Salmonella enterica* through the Gastrointestinal Tract of Turtles. *PLoS ONE*, 3(7), e2826.  
<https://doi.org/10.1371/journal.pone.0002826>
- Smith, K., Smith, K., & D'Auria, J. (2012). Exotic pets: health and safety issues for children and parents. *Journal of Pediatric Health Care*, 26(2), e2–e6.  
<https://doi.org/10.1016/j.pedhc.2011.11.009>
- Snyder, S., & Tkach, V. (2006). *Paradeuterobaris victoriae* n. sp. (Digenea: Microscaphidiidae) and *Buckarootrema minuta* n. sp. (Digenea: Pronocephalidae) from the Victoria River Red-Faced Turtle, *Emydura victoriae* (Pleurodira: Chelidae) in Australia. *Comparative Parasitology*, 73(1), 7–13. <https://doi.org/10.1654/4201.1>
- Snyder, S., & Tkach, V. (2011). *Aptorchis kuchlingi* n. sp. (Digenea: Plagiorchioidea) from the Oblong Turtle, *Chelodina oblonga* (Pleurodira: Chelidae), in Western Australia. *Comparative Parasitology*, 78(2), 280–285. <https://doi.org/10.1654/4401.1>
- Soares, P., Brito, E., Paiva, F., Pavan, D., & Viana, L. (2014). *Haemogregarina* spp. In a wild population from *Podocnemis unifilis* Troschel, 1848 in the Brazilian Amazonia. *Parasitology Research*, 113(12), 4499–4503. <https://doi.org/10.1007/s00436-014-4139-7>
- Soccini, C., & Ferri, V. (2004). Bacteriological screening of *Trachemys scripta elegans* and *Emys orbicularis* in the Po plain (Italy). *Biologia*, 59, 201–207.

- Somma, A., Lima, L., Lange, R., Turner-Giannico, A., & Montiani-Ferreira, F. (2015). The eye of the red-eared slider turtle: Morphologic observations and reference values for selected ophthalmic diagnostic tests. *Veterinary Ophthalmology*, 18, 61–70. <https://doi.org/10.1111/vop.12213>
- Song, D., He, X., Chi, Y., Zhang, Z., Shuai, J., Wang, H., Li, Q., & Du, M. (2023). Cytotoxicity and antimicrobial resistance of *Salmonella enterica* subspecies isolated from raised reptiles in Beijing, China. *Animals*, 13(2), 315. <https://doi.org/10.3390/ani13020315>
- Sprent, J. F. A. (1980). Ascaridoid nematodes of amphibians and reptiles: *Angusticaecum* and *Krefftasca* n.g. *Journal of Helminthology*, 54(1), 55–73. <https://doi.org/10.1017/S0022149X00006350>
- Sue, L. J., & Platt, T. R. (1998). Redescription and life-cycle of shape *Sigmaopera cincta* Nicoll, 1918 (Digenea: Plagiorchiidae) a parasite of Australian freshwater turtles. *Systematic Parasitology*, 39(3), 223–235. <https://doi.org/10.1023/A:1005995104546>
- Sue, L., & Platt, T. (1999a). Description and life-cycle of three new species of *Dingularis* n. g. (Digenea: Plagiorchiida), parasites of Australian freshwater turtles. *Systematic Parasitology*, 43(3), 175–207. <https://doi.org/10.1023/A:1006163819279>
- Sue, L., & Platt, T. (1999b). Description and life-cycle of *Thrinascotrema brisbanica* n. g., n. sp. (Digenea: Plagiorchiida), a parasite of the freshwater turtle *Elseya latisternum* from Australia, and the erection of the family Thrinascotrematidae. *Systematic Parasitology*, 43(3), 217–227. <https://doi.org/10.1023/A:1006145117356>
- Sullivan, J. (1976). *Parapleurogonius brevicecum* gen. et sp. N. (Trematoda: Pronocephalidae) from a freshwater turtle in peninsular Malaysia. *The Southeast Asian Journal of Tropical Medicine and Public Health*, 7(4), 540–542.
- Taira, K., Nishiyama, K., & Ooi, H.-K. (2021). *Trichinella pseudospiralis* infection in red-eared slider, *Trachemys scripta*, influenced by environmental temperature. *Parasitology International*, 84, 102413. <https://doi.org/10.1016/j.parint.2021.102413>
- Thomas, S., Glover, M., Parthasarathy, A., Wong, N., Shipman, P., & Hudson, A. (2020). Expression of a shiga-like toxin during plastic colonization by two multidrug-resistant bacteria, *Aeromonas hydrophila* RIT668 and *Citrobacter freundii* RIT669, isolated from endangered turtles (*Clemmys guttata*). *Microorganisms*, 8(8), 1172. <https://doi.org/10.3390/microorganisms8081172>

- Tinsley, R. (1973). Observations on Polystomatidae (Monogenoidea) from East Africa with a Description of *Polystoma makereri* n. sp. Zeitschrift Für Parasitenkunde, 42, 251–263.
- Tkach, V., & Snyder, S. (2006). *Doodytrema carettochelydis* n. gen., n. sp., (Digenea: Microscaphidiidae) from the Pig-Nosed Turtle, *Carettochelys insculpta*, (Cryptodira: Carettochelydidae) in Australia. Comparative Parasitology, 73(2), 165–171. <https://doi.org/10.1654/4238.1>
- Tkach, V., & Snyder, S. (2007). *Choanocotyle platti* sp. nov. from the northern long-necked turtle, *Chelodina rugosa* (Pleurodira, Chelidae) in Australia. Acta Parasitologica, 52(4). <https://doi.org/10.2478/s11686-007-0057-5>
- Tkach, V., Kuzmin, Yu., & Snyder, S. (2010). *Krefftasca* (Nematoda, Ascaridoidea) from australian side-necked turtles with description of *Krefftasca sharpiloi* sp. n. from *Chelodina rugosa*. Vestnik Zoologii, 44(1), e-1-e-11. <https://doi.org/10.2478/v10058-010-0001-2>
- Trivalairat, P., Chiangkul, K., & Purivirojkul, W. (2019). *Placobdelloides sirikanchanae* sp. nov., a new species of glossiphoniid leech and a parasite of turtles from lower southern Thailand (Hirudinea, Rhynchobdellida). ZooKeys, 882, 1–24. <https://doi.org/10.3897/zookeys.882.35229>
- Trivalairat, P., Trivalairat, K., Tassamakorn, A., & Purivirojkul, W. (2023). Blood recovery of wild Mekong snail-eating turtles (*Malayemys subtrijuga* Schlegel and Müller, 1845) in captivity from leech infestation. International Journal for Parasitology: Parasites and Wildlife, 22, 126–135. <https://doi.org/10.1016/j.ijppaw.2023.10.001>
- Tucker, A., Fitzsimmons, N., & Govedich, F. (2005). *Euhirudinea* from australian turtles (*Chelodina burrungandjii* and *Emydura australis*) of the Kimberley Plateau, Western Australia, Australia. Comparative Parasitology, 72(2), 241–244. <https://doi.org/10.1654/4175>
- Ulmer, M., & Sommer, S. (1957). Development of sporocysts of the turtle lung fluke, *Heronimus chelydrae* MacCallum (Trematoda: Heronimidae). Proceedings of the Iowa Academy of Science, 64, 601–613.
- Umbrasko, I., Harlamova, N., Pupins, M., & Skute, N. (2020). Skin microbiome of free-living european pond turtle (*Emys orbicularis* (L.)) on the northern border of its range in silene nature park, Latvia. Acta Biologica Universitatis Daugavpiliensis, 20(2), 155–161.

- Úngari, L., Santos, A., O'Dwyer, L., Silva, M., Fava, N., Paiva, G., Pinto, R., & Cury, M. (2018). *Haemogregarina podocnemis* sp. nov.: Description of a new species of *Haemogregarina* Danilewsky 1885 (Adeleina: Haemogregarinidae) in free-living and captive yellow-spotted river turtles *Podocnemis unifilis* (Testudines: Podocnemididae) from Brazil. *Parasitology Research*, 117(5), 1535–1548. <https://doi.org/10.1007/s00436-018-5817-7>
- Úngari, L., Santos, A., Silva, R., & O'Dwyer, L. (2023). Hemogregarine diversity infecting brazilian turtles with a description of six new species of *Haemogregarina* (Apicomplexa: Adeleorina: Haemogregarinidae). *Diversity*, 15(2), 296. <https://doi.org/10.3390/d15020296>
- Unger, S., Escobar, J., & Rollins, M. (2019). Prevalence of external and internal parasites of four species of freshwater turtles (*Trachemys scripta*, *Chrysemys picta*, *Chelydra serpentina*, and *Sternotherus odoratus*) in the piedmont of North Carolina, USA. *Journal of Entomology and Zoology Studies*, 7(5), 912–915.
- Vecchioni, L., Marrone, F., Liuzzo, M., Seglie, D., Cavalcante, R., Bazan, G., Arizza, V., & Arculeo, M. (2021). New molecular data attest to the absence of cospeciation patterns between *Placobdella costata* (Fr. Müller, 1846) (Hirudinea) and freshwater turtles (*Emys* spp.) in Italy. *The European Zoological Journal*, 88(1), 959–965. <https://doi.org/10.1080/24750263.2021.1965233>
- Verneau, O., Johnston, G., & Du Preez, L. (2023a). A quantum leap in the evolution of platyhelminths: Host-switching from turtles to hippopotamuses illustrated from a phylogenetic meta-analysis of polystomes (Monogenea, Polystomatidae). *International Journal for Parasitology*, 53(5–6), 317–325. <https://doi.org/10.1016/j.ijpara.2023.03.001>
- Verneau, O., Melliti, S., Kimdil, L., El Mouden, E., Achouri, M., & Rouag, R. (2023b). Molecular phylogenies of leeches and haemoparasites infecting freshwater turtles in aquatic ecosystems of northern africa suggest phylogenetic congruence between *Placobdella costata* sensu lato and *Haemogregarina stepanowi* sensu lato. *Microorganisms*, 11(6), 1584. <https://doi.org/10.3390/microorganisms11061584>
- Verneau, O., Palacios, C., Platt, T., Alday, M., Billard, E., Allienne, J.-F., Basso, C., & Du Preez, L. (2011). Invasive species threat: Parasite phylogenetics reveals patterns and processes of host-switching between non-native and native captive freshwater turtles. *Parasitology*, 138(13), 1778–1792. <https://doi.org/10.1017/S0031182011000333>

- Viana, D., Rodrigues, J., Madelaire, C., Clara, A., Santos, G., & Sousa, A. (2016). Nematoda of *Kinosternon scorpioides* (Testudines: Kinosternidae) from Northeastern Brazil. *Journal of Parasitology*, 102(1), 165–166. <https://doi.org/10.1645/15-788>
- Vieira, F., Novelli, I., Sousa, B., & Lima, S. (2008). A new species of *Polystomoides* Ward, 1917 (Monogenea: Polystomatidae) from freshwater chelonians (Testudines: Chelidae) in Brazil. *Journal of Parasitology*, 94(3), 626–630. <https://doi.org/10.1645/GE-1417.1>
- Vincent, E., Fayette, M., Grifioen, J., Adamovicz, L., Ospina, E., & Allender, M. (2023). Health assessment of painted turtles (*Chrysemys picta*) in a restored wetland habitat in northwestern Indiana, USA. *Journal of Wildlife Diseases*, 59(2), 245–258.
- Vorbach, B., Clayton, L., Roosenburg, W., Norton, T., Adamovicz, L., Hadfield, C., & Allender, M. (2022). Prevalence of multiple reptilian pathogens in the oropharyngeal mucosa, cloacal mucosa, and blood of diamondback terrapin (*Malaclemys terrapin*) populations from Maryland and Georgia, USA. *Journal of Wildlife Diseases*, 58(4), 782–790. <https://doi.org/10.7589/JWD-D-21-00107>
- Wacha, R., & Christiansen, J. (1976). Coccidian Parasites from Iowa Turtles: Systematics and Prevalence. *The Journal of Protozoology*, 23(1), 57–63. <https://doi.org/10.1111/j.1550-7408.1976.tb05246.x>
- Waltzek, T., Stacy, B., Ossiboff, R., Stacy, N., Fraser, W., Yan, A., Mohan, S., Koonin, E., Wolf, Y., Rodrigues, T., Viadanna, P., Subramaniam, K., Popov, V., Guzman-Vargas, V., & Shender, L. A. (2022). A novel group of negative-sense RNA viruses associated with epizootics in managed and free-ranging freshwater turtles in Florida, USA. *PLOS Pathogens*, 18(3), e1010258. <https://doi.org/10.1371/journal.ppat.1010258>
- Wang, J., Yan, M., Gao, H., Lu, X., & Kan, B. (2017). *Vibrio cholerae* Colonization of Soft Shelled Turtles. *Applied and Environmental Microbiology*, 83(14), e00713-17. <https://doi.org/10.1128/AEM.00713-17>
- Ward, J., Hall, K., Christian, L., & Lewbart, G. (2012). Plasma biochemistry and condition of confiscated hatchling pig-nosed turtles (*Carettochelys insculpta*). *Herpetological Conservation and Biology*, 7(1), 38–45.
- Watermolen, D. J. (1996). Notes on the leech *Desserobdella picta* (Hirudinea: Glossiphoniidae). *Journal of Freshwater Ecology*, 11(2), 211–217. <https://doi.org/10.1080/02705060.1996.9663480>

- Watson, N., & Rohde, K. (1995). Ultrastructure of spermiogenesis and spermatozoa of *Neopolystoma spratti* (Platyhelminthes, Monogenea, Polystomatidae). *Parasitology Research*, 81(4), 343–348. <https://doi.org/10.1007/BF00931542>
- Weerakhun, S., Kongsanan, P., & Kongkham, W. (2022). Distribution of *Salmonella* spp. and serovars isolated from captive reptiles in four zoos of the Zoological Park Organization, Thailand, between 2017 and 2018. *Thai J Vet Med.*, 52(2), 349–358.
- Werner, R. (2003). Parasites in the Diamondback Terrapin, *Malaclemys terrapin*: A Review. *Journal of Herpetological Medicine and Surgery*, 13(4), 5–9. <https://doi.org/10.5818/1529-9651.13.4.5>
- Wesson, J., O’Dea, M., & Hyndman, T. (2023). A review of reptile virus experimental infection studies. *Journal of General Virology*, 104(4). <https://doi.org/10.1099/jgv.0.001832>
- Wharton, G. (1940). The Genera *Telorchis*, *Protenes*, and *Auridistomum* (Trematoda: Reniferidae). *The Journal of Parasitology*, 26(6), 497. <https://doi.org/10.2307/3272252>
- Winter, J. M., Wellehan, J. F. X., Apakupakul, K., Palmer, J., Brenn-White, M., Standorf, K., Berry, K. H., Childress, A. L., Koplos, P., Garner, M. M., & Deem, S. L. (2022). A novel herpesvirus detected in 3 species of chelonians. *Journal of Veterinary Diagnostic Investigation*, 34(4), 594–601. <https://doi.org/10.1177/10406387221092048>
- Winter, J., Mumm, L., Adamovicz, L., Andersson, K., Glowacki, G., & Allender, M. (2020). Characterizing the epidemiology of historic and novel pathogens in Blanding’s turtles (*Emydoidea blandingii*). *Journal of Zoo and Wildlife Medicine*, 51(3), 606–617. <https://doi.org/10.1638/2019-0154>
- Wirth, W., & Ariel, E. (2020). Temperature-dependent infection of freshwater turtle hatchlings, *Emydura macquarii krefftii*, inoculated with a ranavirus isolate (Bohle iridovirus, Iridoviridae). *FACETS*, 5(1), 821–830. <https://doi.org/10.1139/facets-2020-0012>
- Wirth, W., Elliott, E., Rudd, D., Hayes, L., MacLaine, A., Mashkour, N., Ahasan, S., Dahl, J., Drane, K., & Ariel, E. (2020). Cutaneous Lesions in Freshwater Turtles (*Emydura macquarii krefftii* and *Myuchelys latisternum*) in a Rainforest Creek in North Queensland, Australia. *Frontiers in Veterinary Science*, 7, 33. <https://doi.org/10.3389/fvets.2020.00033>
- Wirth, W., Forzán, M., Schwarzkopf, L., & Ariel, E. (2023). Pathogenesis of Bohle iridovirus infection in Krefft’s freshwater turtle hatchlings (*Emydura macquarii krefftii*). *Veterinary Pathology*, 60(1), 139–150. <https://doi.org/10.1177/03009858221122591>



- Wirth, W., Schwarzkopf, L., Skerratt, L., Tzamouzaki, A., & Ariel, E. (2019). Dose-dependent morbidity of freshwater turtle hatchlings, *Emydura macquarii krefftii*, inoculated with Ranavirus isolate (Bohle iridovirus, Iridoviridae). *Journal of General Virology*, 100(10), 1431–1441. <https://doi.org/10.1099/jgv.0.001324>
- Woo, P. (1969). Trypanosomes in amphibians and reptiles in southern Ontario. *Canadian Journal of Zoology*, 47(5), 981–988. <https://doi.org/10.1139/z69-158>
- Woodburn, D., Kinsel, M., Poll, C., Langan, J., Haman, K., Gamble, K., Maddox, C., Jeon, A., Wellehan, J., Ossiboff, R., Allender, M., & Terio, K. (2021). Shell lesions associated with *Emydomyces testavorans* infection in freshwater aquatic turtles. *Veterinary Pathology*, 58(3), 578–586. <https://doi.org/10.1177/0300985820985217>
- Wright, T., Gjeltrema, J., Wack, R., Woodburn, D., & Tell, L. (2021). Plasma voriconazole concentrations following single- and multiple-dose subcutaneous injections in western pond turtles (*Actinemys marmorata*). *Journal of Zoo and Wildlife Medicine*, 52(2), 538–547. <https://doi.org/10.1638/2020-0161>
- Wu, B., Huang, L., Chen, J., Zhang, Y., Wang, J., & He, J. (2021). Gut microbiota of homologous Chinese soft-shell turtles (*Pelodiscus sinensis*) in different habitats. *BMC Microbiology*, 21(1), 142. <https://doi.org/10.1186/s12866-021-02209-y>
- Yamanaka, T., & Suzuki, D. (2008). Geographical distribution of *Ozobranchus jantseanus* (Annelida: Hirudinida: Ozobranchidae) in Japan. *Medical Entomology and Zoology*, 59(4), 345–349.
- Yamauchi, T., Nishibori, T., & Suzuki, D. (2012). First report of *Ozobranchus jantseanus* (Hirudinida: Ozobranchidae) parasitizing the exotic red-eared slider *Trachemys scripta elegans* in Japan. *Comparative Parasitology*, 79(2), 348–349. <https://doi.org/10.1654/4553.1>
- Yamauchi, T., Yoshigou, H., & Itoh, T. (2013). Occurrence of *Parabdelia quadrioculata* (Annelida: Hirudinida: Glossiphoniidae) in Japan, with a first case of human infestation by the leech. *Comparative Parasitology*, 80(1), 134–135. <https://doi.org/10.1654/4593.1>
- Yang, R., Brice, B., Elloit, A., Lee, E., & Ryan, U. (2015). *Eimeria collieie* n. sp. (Apicomplexa:Eimeriidae) from the western long-necked turtle (*Chelodina colliei*). *Experimental Parasitology*, 154, 75–81. <https://doi.org/10.1016/j.exppara.2015.04.019>

- Yang, S., Feng, L., Zhang, J., Yan, C., Zhang, C., Huang, Y., Li, M., Luo, W., Huang, X., Wu, J., Du, X., & Li, Y. (2023). Effect of Purslane (*Portulaca oleracea* L.) on intestinal morphology, digestion activity and microbiome of chinese pond turtle (*Mauremys reevesii*) during *Aeromonas hydrophila* infection. *International Journal of Molecular Sciences*, 24(12), 10260. <https://doi.org/10.3390/ijms241210260>
- Youssefi, M., Mousapour, A., Nikzad, R., Gonzalez-Solis, D., Halajian, A., & Rahimi, M. (2016). Gastrointestinal helminths of the Caspian turtle, *Mauremys caspica* (Testudines), from Northern Iran. *Journal of Parasitic Diseases*, 40(1), 65–68. <https://doi.org/10.1007/s12639-014-0446-2>
- Zechmeisterová, K., Přibyl, M., Nguyen, H., Nosková, E., & Šíroký, P. (2022). Haemogregarines of the Genera *Haemogregarina*, *Hemolivia*, and *Hepatozoon* infecting vietnamese freshwater turtles, with additional notes on primer specificity and primer-template mismatches affecting diagnostic success. *Protist*, 173(4), 125884. <https://doi.org/10.1016/j.protis.2022.125884>
- Zhang, J., Finlaison, D., Frost, M., Gestier, S., Gu, X., Hall, J., Jenkins, C., Parrish, K., Read, A., Srivastava, M., Rose, K., & Kirkland, P. (2018). Identification of a novel nidovirus as a potential cause of large scale mortalities in the endangered Bellinger River snapping turtle (*Myuchelys georgesi*). *PLOS ONE*, 13(10), e0205209. <https://doi.org/10.1371/journal.pone.0205209>
- Zhang, J., Kuang, D., Wang, F., Meng, J., Jin, H., Yang, X., Liao, M., Klena, J. D., Wu, S., Zhang, Y., & Xu, X. (2016). turtles as a possible reservoir of nontyphoidal *Salmonella* in Shanghai, China. *Foodborne Pathogens and Disease*, 13(8), 428–433. <https://doi.org/10.1089/fpd.2015.2107>
- Zhou, A., Xie, S., Sun, D., Zhang, P., Dong, H., Zuo, Z., Li, X., & Zou, J. (2020). a first insight into the structural and functional comparison of environmental microbiota in freshwater turtle *Chinemys reevesii* at different growth stages under pond and greenhouse cultivation. *Microorganisms*, 8(9), 1277. <https://doi.org/10.3390/microorganisms8091277>
- Zwart, P. (2006). Renal Pathology in Reptiles. *Veterinary Clinics of North America: Exotic Animal Practice*, 9(1), 129–159. <https://doi.org/10.1016/j.cvex.2005.10.005>
